# Supplementary material for: Sampling inequalities affect generalization of neuroimaging-based diagnostic classifiers in psychiatry
Source: Springer Nature journal article supplement (doi:10.1186/s12916-023-02941-4), 2023-07-03
Supplement: MOESM1 [file 25568348]

## SUPPLEMENTARY MATERIALS: Sampling inequalities affect generalization of neuroimaging-based diagnostic classifiers in psychiatry

Zhiyi Chen<sup>1,2\*</sup>, Bowen Hu<sup>1,2</sup>, Xuerong Liu<sup>1</sup>, Benjamin Becker<sup>3,4</sup>, Simon B. Eickhoff<sup>5</sup>, Kuan Miao<sup>1</sup>, Xingmei Gu<sup>1</sup>, Yancheng Tang<sup>6</sup>, Xin Dai<sup>2</sup>, Chao Li<sup>7</sup>, Artemiy Leonov<sup>8</sup>, Zhibing Xiao<sup>9</sup>, Zhengzhi Feng<sup>1</sup>, Ji Chen<sup>10,11\*</sup>, Hu Chuan-Peng<sup>12</sup>

<sup>1</sup> Experimental Research Center for Medical and Psychological Science (ERC-MPS), School of Psychology, Third Military Medical University, Chongqing, China

<sup>2</sup> Faculty of Psychology, Southwest University, Chongqing, China

<sup>3</sup> The Center of Psychosomatic Medicine, Sichuan Provincial Center for Mental Health, Sichuan Provincial People's Hospital, Chengdu, China

<sup>4</sup> The Clinical Hospital of Chengdu Brain Science Institute, MOE Key Laboratory for Neuroinformation, University of Electronic Science and Technology of China, Chengdu, China

<sup>5</sup> Institute of Systems Neuroscience, Heinrich Heine University Düsseldorf, Düsseldorf, Germany

<sup>6</sup> School of Business and Management, Shanghai International Studies University, Shanghai, China

<sup>7</sup> Department of Radiology, The Third Affiliated Hospital, Sun Yat-Sen University, Guangdong, China

<sup>8</sup> School of Psychology, Clark University, Massachusetts, USA

<sup>9</sup> State Key Laboratory of Cognitive Neuroscience and Learning, Beijing Normal University, Beijing, China

<sup>10</sup> Department of Psychology and Behavioral Sciences, Zhejiang University, Hangzhou, China

<sup>11</sup> Department of Psychiatry, The Fourth Affiliated Hospital, Zhejiang University School of Medicine, Yiwu, Zhejiang, China;

<sup>12</sup> School of Psychology, Nanjing Normal University, Nanjing, China

\* Corresponding authors: Zhiyi Chen ([chenzhiyi@tmmu.edu.cn](mailto:chenzhiyi@tmmu.edu.cn)); Ji Chen ([jichen.allen@hotmail.com](mailto:jichen.allen@hotmail.com))

## Contents

|                                                                                                                                                                                                                       |    |
|-----------------------------------------------------------------------------------------------------------------------------------------------------------------------------------------------------------------------|----|
| <b>SI Methods</b> .....                                                                                                                                                                                               | 1  |
| <b>SI Results</b> .....                                                                                                                                                                                               | 2  |
| <b>SI Supplementary Fig. 1</b> Research pipelines for data acquisition .....                                                                                                                                          | 4  |
| <b>SI Supplementary Fig. 2</b> PRISMA 2020 flow diagram for the current study .....                                                                                                                                   | 6  |
| <b>SI Supplementary Fig. 3</b> Trends in ML-based diagnostic prediction for psychiatric diseases by<br>Neural features .....                                                                                          | 7  |
| <b>SI Supplementary Fig. 4</b> Mental health disorders as the portion of total disease burden at<br>2019 (CC-BY) .....                                                                                                | 8  |
| <b>SI Supplementary Fig. 5</b> Geospatial model for sampling population within China (A),<br>Germany (B) and U.K (C).....                                                                                             | 9  |
| <b>SI Supplementary Fig. 6</b> Distribution of methodological details .....                                                                                                                                           | 10 |
| <b>SI Supplementary Fig. 7</b> Model performance across algorithm (A), toolkit (B), cross-validation<br>(C), sample size (D) and skewness (E) .....                                                                   | 11 |
| <b>SI Supplementary Fig. 8</b> Model performance across validations (A-B), trajectories (C),<br>psychiatric categories (D), journal impacts (E), scanning<br>technology/modality (F) and institutes/datasets (G)..... | 13 |
| <b>SI Supplementary Tab. 1</b> Curve fitting results for exponential function model.....                                                                                                                              | 14 |
| <b>SI Supplementary Tab. 2</b> Journals counts for papers aiming at neuropsychiatric diagnostic<br>prediction (classification) .....                                                                                  | 15 |
| <b>SI Supplementary Tab. 3</b> Counts for contributors' sources for these papers .....                                                                                                                                | 19 |
| <b>SI Supplementary Tab. 4</b> Summary for sample population for these papers in the world ....                                                                                                                       | 20 |
| <b>SI Supplementary Tab. 5</b> Summary for sample population for these papers in the U.S .....                                                                                                                        | 21 |
| <b>SI Supplementary Tab. 6</b> Summary for sample population for these papers in the China ....                                                                                                                       | 22 |
| <b>SI Supplementary Tab. 7</b> Summary for sample population for these papers in the<br>Germany .....                                                                                                                 | 23 |
| <b>SI Supplementary Tab. 8</b> Summary for sample population for these papers in the U.K .....                                                                                                                        | 24 |
| <b>SI Supplementary Tab. 9</b> Sampling inequalities for globe and countries/regions .....                                                                                                                            | 25 |
| <b>SI Supplementary Tab. 10</b> Sampling inequalities for continents .....                                                                                                                                            | 26 |
| <b>SI Supplementary Tab. 11</b> Sampling inequalities and national development index .....                                                                                                                            | 27 |
| <b>SI Supplementary Tab. 12</b> Sample size during recent decade for all the studies .....                                                                                                                            | 28 |
| <b>SI Supplementary Tab. 13</b> Sample size during recent decade for studies using self-recruiting<br>sample .....                                                                                                    | 29 |
| <b>SI Supplementary Tab. 14</b> Sample size during recent decade for studies using open dataset.<br>.....                                                                                                             | 30 |
| <b>SI Supplementary Tab. 15</b> Sample size during recent three decades in the current study ...                                                                                                                      | 31 |
| <b>SI Supplementary Tab. 16</b> Summary for what models (algorithms) were built for<br>neuropsychiatric diagnostic prediction in existing studies .....                                                               | 32 |
| <b>SI Supplementary Tab. 17</b> Summary for what cross-validation (CV) schemes were used to<br>estimate model performance .....                                                                                       | 34 |
| <b>SI Supplementary Tab. 18</b> Summary for feature selection methods in existing studies .....                                                                                                                       | 35 |
| <b>SI Supplementary Tab. 19</b> Summary for what neural features (modality) were used in existing<br>studies .....                                                                                                    | 38 |

---

|                                 |                                                                                                                                                                                             |    |
|---------------------------------|---------------------------------------------------------------------------------------------------------------------------------------------------------------------------------------------|----|
| <b>SI Supplementary Tab. 20</b> | Summary for what pre-processing methods were used in existing studies .....                                                                                                                 | 39 |
| <b>SI Supplementary Tab. 21</b> | Trends for the ratio of using open dataset on training ML models .....                                                                                                                      | 40 |
| <b>SI Supplementary Tab. 22</b> | Results for comparison between SVM and DL classifiers on model Performance .....                                                                                                            | 41 |
| <b>SI Supplementary Tab. 23</b> | Results for comparison between external validation CV (leave-one-site-out CV and independent-samples (sites) CV) and others (i.e., k-fold, LOSO and hold-out CV) on model performance ..... | 42 |
| <b>SI Supplementary Tab. 24</b> | Results for correlation between time and quality scores .....                                                                                                                               | 43 |
| <b>SI Supplementary Tab. 25</b> | Study quality across psychiatric category .....                                                                                                                                             | 44 |

**Supplementary texts****SI Methods**

## ARIMA model

To examine the data stationarity, we used MATLAB to plot time series data for visualization inspection. Then, the Dickey-Fuller test and KPSS test have been done to examine data stationarity by statistical inferences. Further, the detrending and 1<sup>st</sup> differences-in-differences (DiD) processes have been used for non-stationarity correction. Subsequently, we have drawn the partial auto regressive function (PACF) and ACP plots to determine model parameters.

## SI Results

### Robust validation for association between sampling inequalities and national development index

We have validated the robustness and sensitivity for association between national development index and sampling inequalities by using parallel statistical models. Results showed significantly positive association between Gross Domestic Product (GDP) and sampling Gini coefficient in parametric model instead of non-parametric one ( $r_{\text{Pearson}} = -.85$ ,  $p = .004$ ,  $\text{BF}_{10} = 13.57$ ;  $r_{\text{Spearman}} = -0.65$ ,  $p = .067$ ,  $\text{BF}_{10} = 1.90$ ). On the other hand, we found null association between sampling Gini coefficient and other national development index, including Human Development Index (HDI) ( $r_{\text{Pearson}} = -.34$ ,  $p = .372$ ,  $\text{BF}_{01} = 1.72$ ;  $r_{\text{Spearman}} = -.03$ ,  $p = .948$ ,  $\text{BF}_{10} = 2.43$ ), total government expenditure on public education (GEE) ( $r_{\text{Pearson}} = -.21$ ,  $p = .58$ ,  $\text{BF}_{10} = 2.16$ ;  $r_{\text{Spearman}} = -.12$ ,  $p = .776$ ,  $\text{BF}_{10} = 2.43$ ) and mental health diseases burden (MHDB) ( $r_{\text{Pearson}} = .40$ ,  $p = .289$ ,  $\text{BF}_{10} = 1.50$ ;  $r_{\text{Spearman}} = .27$ ,  $p = .490$ ,  $\text{BF}_{10} = 1.79$ ). Further, to obviate algorithmic pitfalls in Gini index, we re-calculated these association by using Theil index, and demonstrated similar results, with positive association to GDP ( $r_{\text{Pearson}} = -.77$ ,  $p = .014$ ,  $\text{BF}_{10} = 5.36$ ;  $r_{\text{Spearman}} = -.65$ ,  $p = .067$ ,  $\text{BF}_{10} = 1.90$ ) and null association to HDI ( $r_{\text{Pearson}} = .15$ ,  $p = .698$ ,  $\text{BF}_{01} = 2.30$ ;  $r_{\text{Spearman}} = .03$ ,  $p = .948$ ,  $\text{BF}_{01} = 2.42$ ), GEE ( $r_{\text{Pearson}} = .05$ ,  $p = .831$ ,  $\text{BF}_{01} = 2.44$ ;  $r_{\text{Spearman}} = -.12$ ,  $p = .776$ ,  $\text{BF}_{01} = 2.43$ ), R&D ( $r_{\text{Pearson}} = -.08$ ,  $p = .821$ ,  $\text{BF}_{01} = 2.41$ ;  $r_{\text{Spearman}} = -.25$ ,  $p = .521$ ,  $\text{BF}_{01} = 2.05$ ) and MHDB ( $r_{\text{Pearson}} = .45$ ,  $p = .223$ ,  $\text{BF}_{01} = 1.27$ ;  $r_{\text{Spearman}} = .27$ ,  $p = .493$ ,  $\text{BF}_{01} = 1.80$ ). In short, the results for the association between sampling inequalities and national development index were robust.

### Permutation test for the association between sampling inequality and national income

We estimated the Pearson correlation coefficient for the association between sampling inequality and national income (i.e., GDP). By visual inspection, we controlled confounding factor from removing two outliers (i.e., China and the USA). We randomly shuffled labels of sampling Gini coefficients to generate pseudo-group. This process has been iterated for 1000 times to produce null distribution. As we assumed the positive direction for this correlation, the one-side statistical inference has been used here. It should be in mind that the p value is found to marginally reach significance ( $p = 0.08$ ).

### Robust validation for the association between time and sample size

Likewise, we also used Spearman correlation to perform robustness validation for the association between time and sample size. Supporting that, we found the significantly positive correlation between time and averaged sample size for all the existing studies (Pearson model,  $r_{\text{total}} = .75$ , 95 % CI: .22 - 0.93,  $p = .013$ ;  $\text{BF}_{10} = 5.83$ , Strong evidence; Spearman model,  $r_{\text{total}} = .79$ , 95 % CI: .33 - 0.95,  $p = .010$ ;  $\text{BF}_{10} = 11$ , Strong evidence). In addition, we also examined this association by using median value, and revealed the same relationship ( $n_{\text{Median, 2011}} = 40$ ,  $n_{\text{Mean, 2020}} = 128$ ,  $r_{\text{total}} = .86$ , 95 % CI: .50 - 0.97,  $p = .001$ ;  $\text{BF}_{10} = 23.40$ , Strong evidence). In total, the positive linear association between time and sample size was robust in the current study.

### K-fold statistics

To tackle with unbalanced number of two groups for comparisons towards model performance,

we used k-fold scheme for down-sampling towards group which has high volume of cases. With respect to algorithm (classifier), we randomly down-sampled SVM group into four folds. Consistent findings were observed in all the folds: the accuracy for SVM classifiers was higher than DL ones (see Supplementary Tab. 22). Likewise, the same solution (i.e., down-sampling whole sample into six folds) was used for comparison for model performance with regards to external validation CV (i.e., leave-one-site-out CV and independent-samples (sites) CV) and others (i.e., k-fold, LOSO and hold-out CV). We observed the model performance was lower in external validation CV than of others in all the folds as well (see Supplementary Tab. 23).

Supplementary Figures

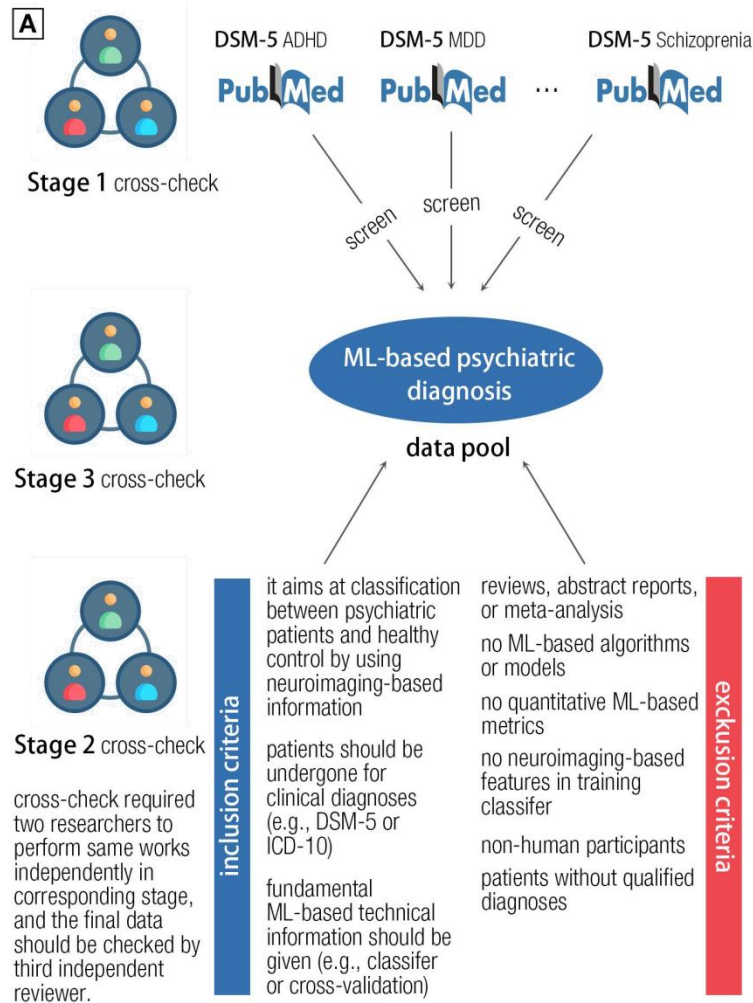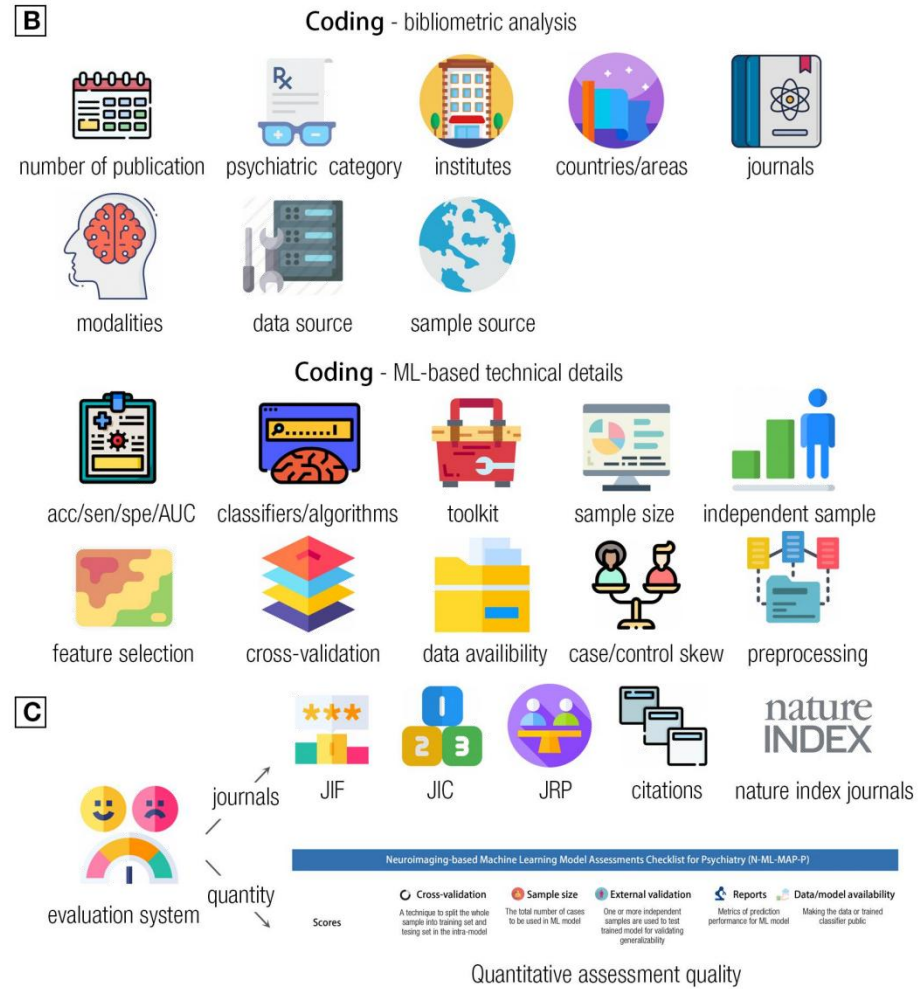

**Supplementary Fig. 1 Research pipelines for data acquisition.** (A) presents literature searching procedure in accordance with PRISMA 2020, and details inclusion and exclusion; each stage required cross-check processing; (B) shows what metainformation we wanna code in bibliometric analysis; (C) shows what evaluation system we built to probe into the association between study quality and these machine-learning metrics (e.g., acc, AUC, CV schemes).



PRISMA 2020 flow diagram for new systematic reviews which included searches of databases and registers only

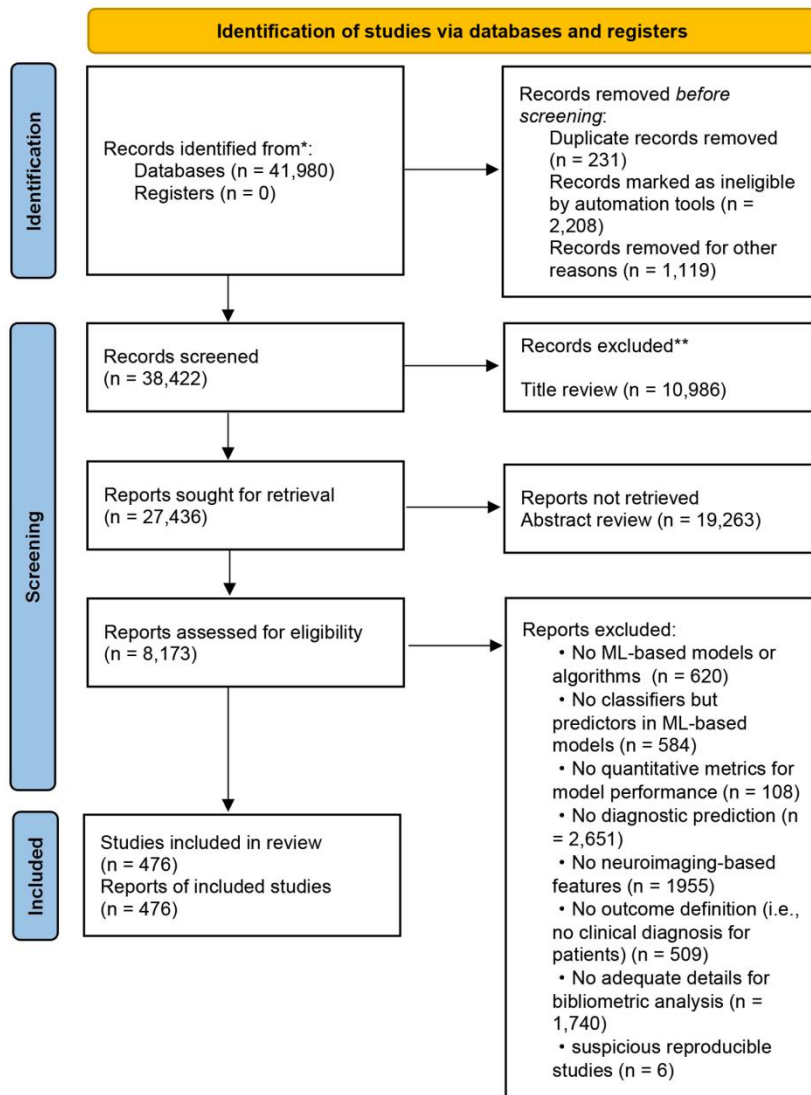

Supplementary Fig. 2 PRISMA 2020 flow diagram for the current study.

**A Growth of neuropsychiatric classification studies**

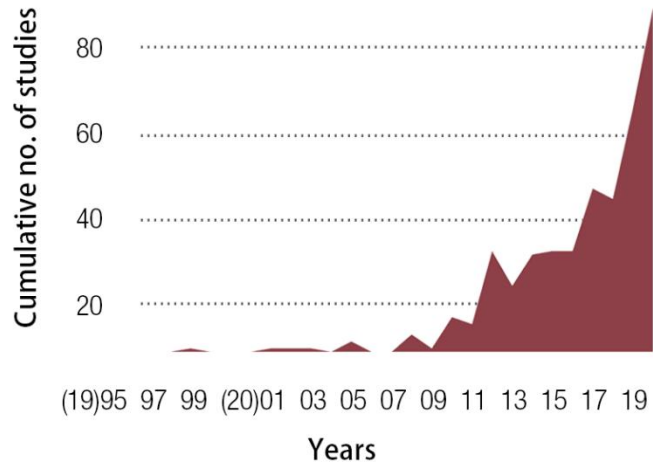

**B Increment rates for psychiatric category**

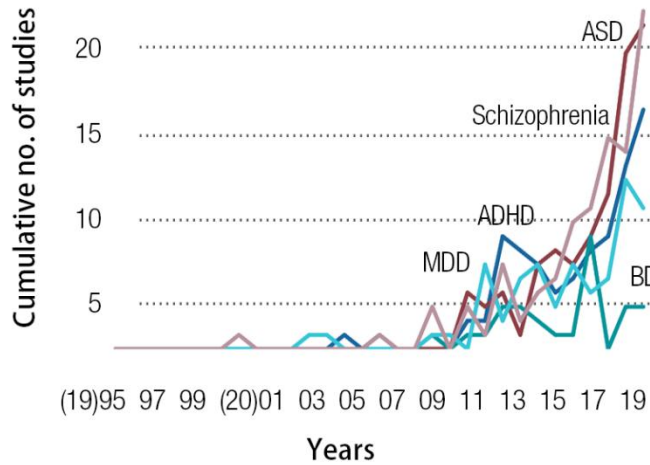

**C Distribution for psychiatric category**

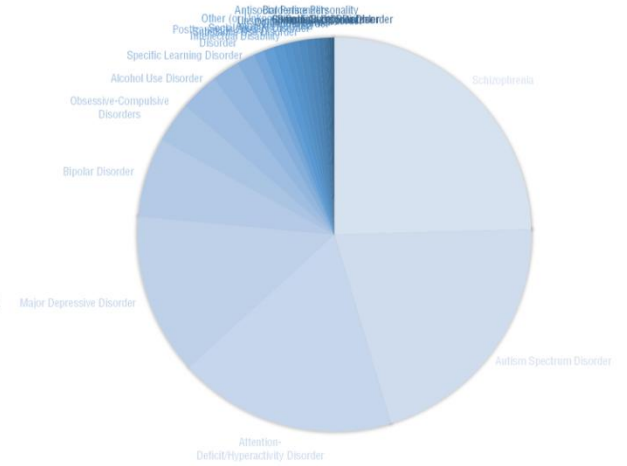

**Supplementary Fig. 3 Trends in ML-based diagnostic prediction for psychiatric diseases by neural features.** (A) describes increased number of studies for relevant studies during recent three decades (1990-2020); (B) plots increment rates of existing studies concerning ML-based psychiatric diagnostic prediction towards ADHD, MDD, SZ and BD; (C) provides a pie plot to show the distribution pattern for psychiatric categories.

### Mental health disorders as a share of total disease burden, 2019

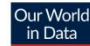

Mental health and neurodevelopment disorders (not including alcohol and drug use disorders) as a share of total disease burden. Disease burden is measured in DALYs (Disability-Adjusted Life Years). DALYs measure total burden of disease - both from years of life lost and years lived with a disability. One DALY equals one lost year of healthy life.

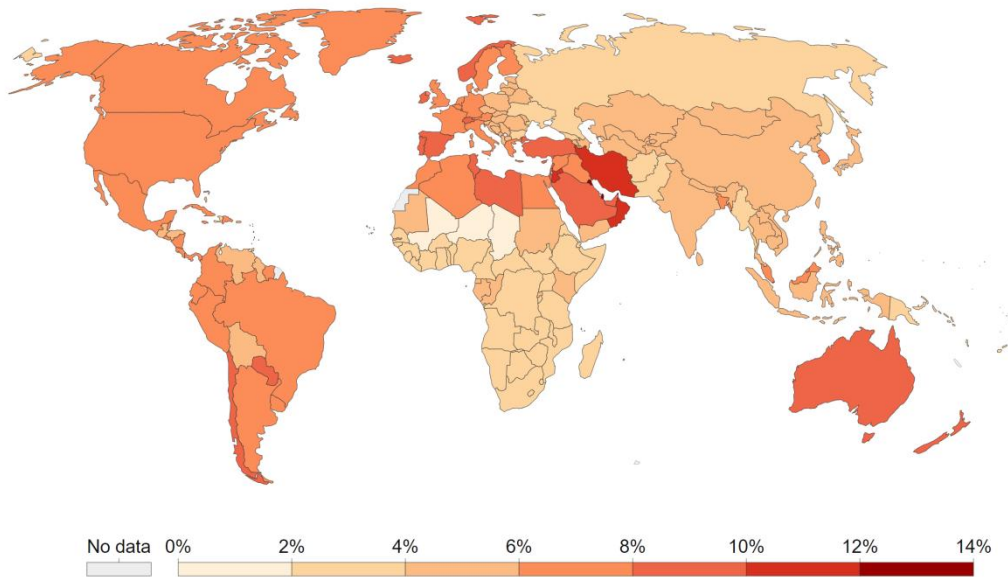

Source: IHME, Global Burden of Disease

CC BY

**Supplementary Fig. 4 Mental health disorders as the portion of total disease burden at 2019 (CC-BY).** Data and map is drawn basing on Our world in data.

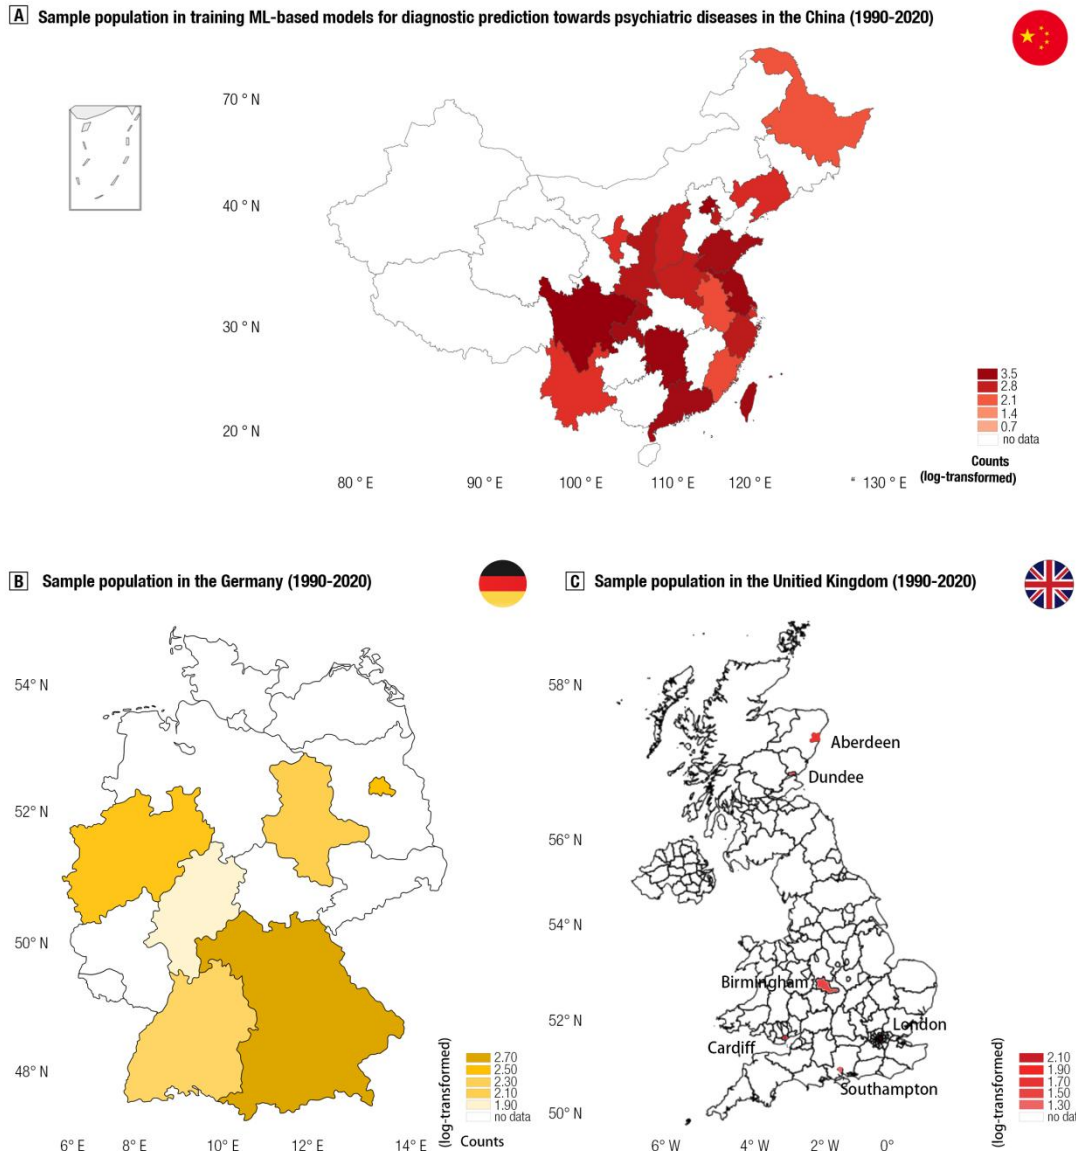

**Supplementary Fig. 5 Geospatial model for sampling population within China (A), Germany (B) and U.K (C).** For readable visualization, the number of participants (sampling population) has been transformed by log functions. Projecting U.K. samples used second-level (i.e. county) administrative fine-grained map.

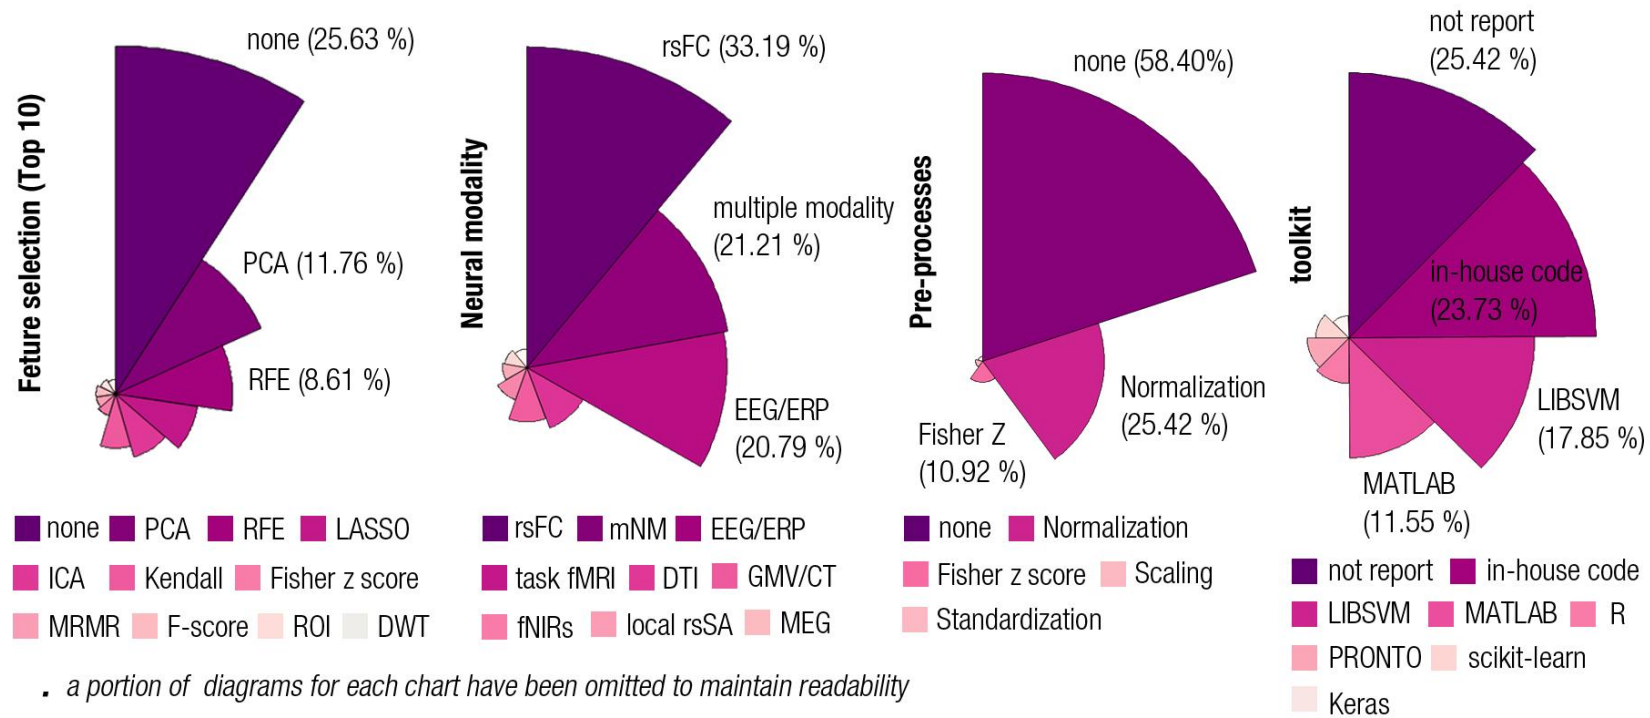

**Supplementary Fig. 6 Distribution of methodological details.** These panels show a portion of methodological parameters (Top 10%) for reliability. Full results can be found in Supplementary Tables.

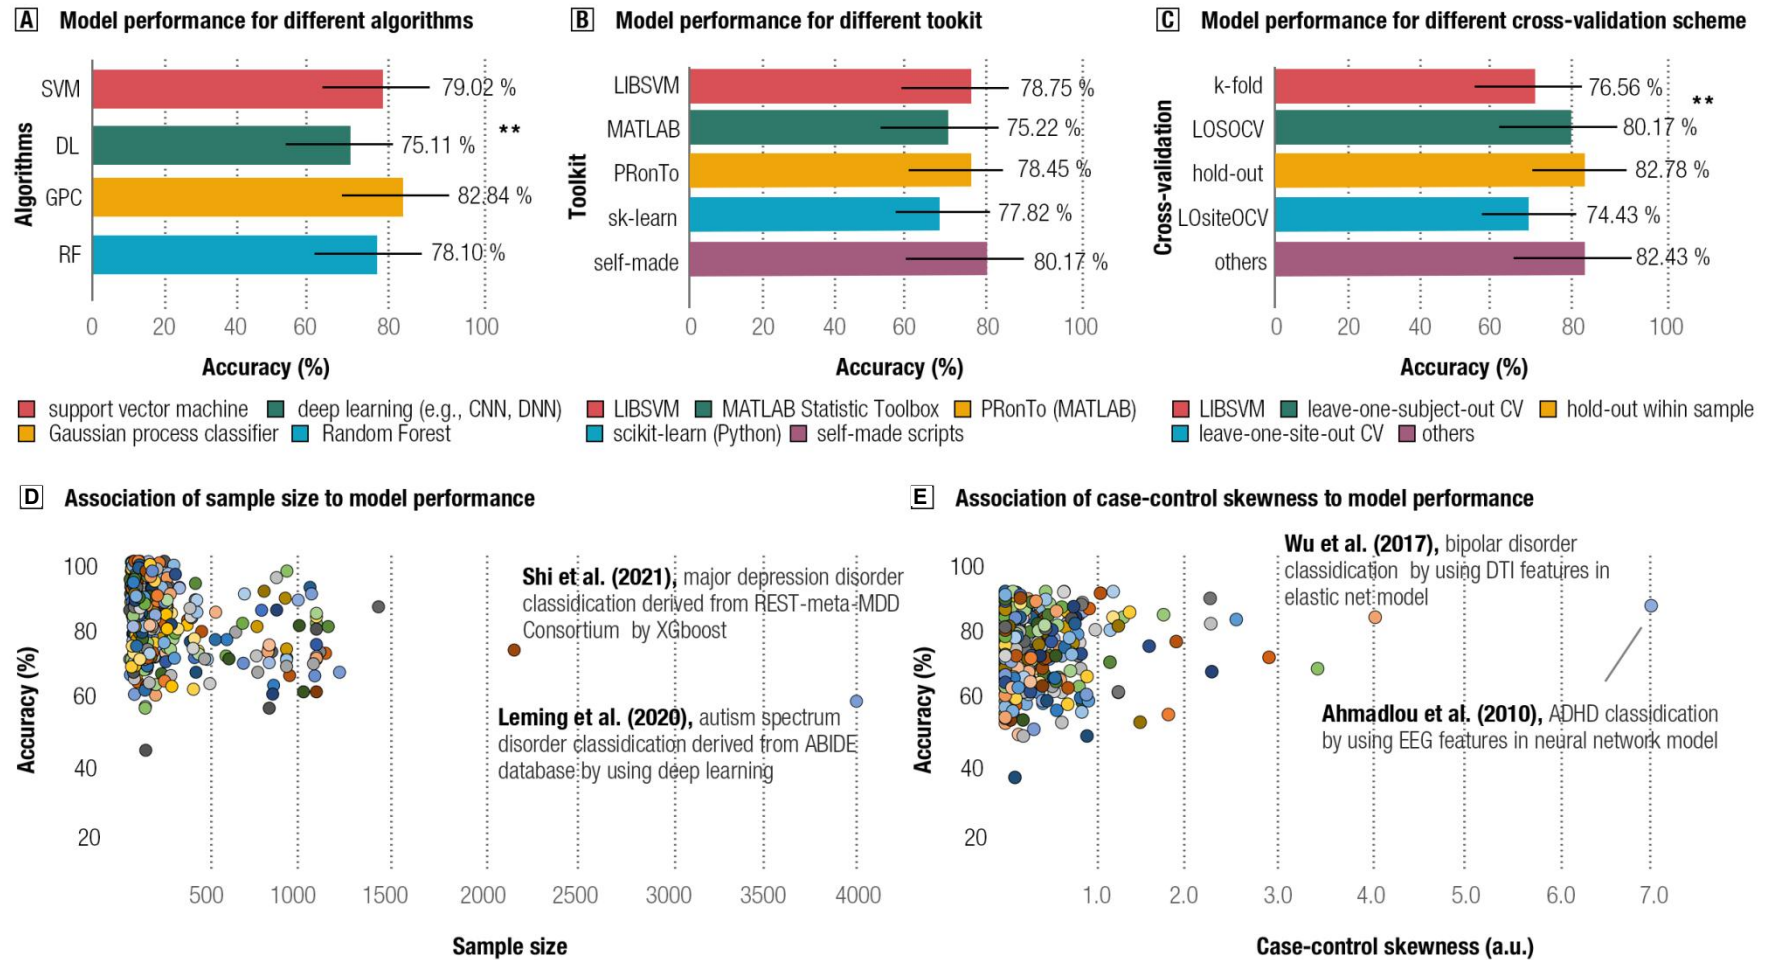

Supplementary Fig. 7 Model performance across algorithm (A), toolkit (B), cross-validation (C), sample size (D) and skewness (E). Precision-weighted method

was used to adjust model accuracy. Non-parametric statistics were conducted for comparison across methodological schemes (i.e., algorithm and cross-validation schemes). \* < .05; \*\* <.01; \*\*\* <.001.



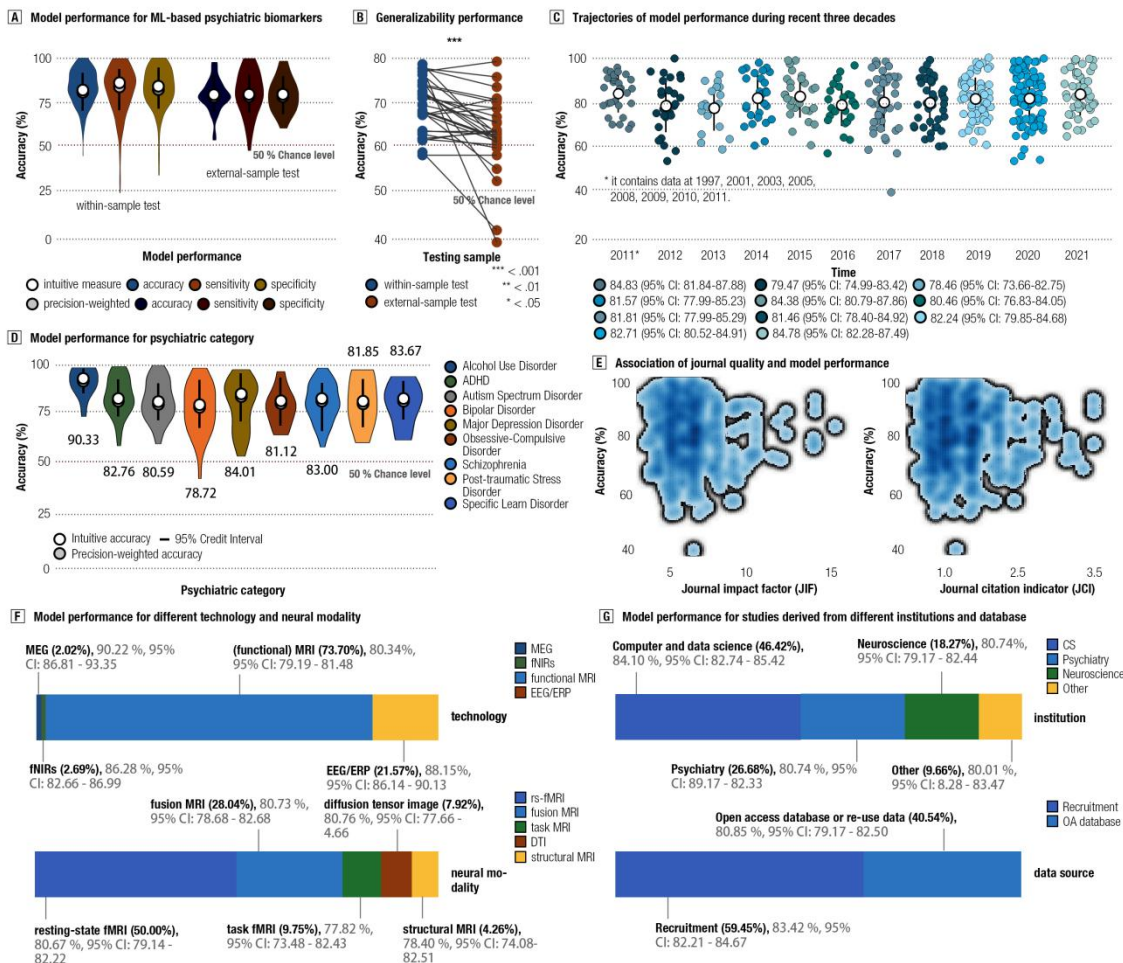

**Supplementary Fig. 8 Model performance across validations (A-B), trajectories (C), psychiatric categories (D), journal impacts (E), scanning technology/modality (F) and institutes/datasets (G). Precision-weighted method was used to adjust model accuracy. Both intuitive measures and precision-weighted measures for estimating model performance for all the studies validating in the internal, which showed accuracy of 82.69 % (precision-weighted, 79.01%; sensitivity of 82.08%, 77.48 (weighted); specificity of 82.39%, 78.40%). Panel B showed that model performance estimated by external sample is significantly declined, which indicated the poor generalizability for these models. Panel C shows no prominent trends for model performance are found, which lead us to imply that the model performance for predicting psychiatric disorders is not improved substantially during recent 30 years. Panel D shows no significant deviation for model performance towards different disorders excepting alcohol use disorder in visual inspection. Panel E shows no significant association between model performance and journal quality (measured by IF and JCI). All the panels show the precision-weighted measures without statistical inferences given the unbalanced sample sizes.**



| Category                                        | b value | 95 % CI       | SSE   | R <sup>2</sup> | Adjust R <sup>2</sup> | DFE | RMSE  |
|-------------------------------------------------|---------|---------------|-------|----------------|-----------------------|-----|-------|
| Schizophrenia                                   | 2.395   | 2.054 - 2.742 | 43.13 | 0.956          | 0.954                 | 29  | 1.219 |
| Major Depression Disorder                       | 1.609   | 1.138 - 2.079 | 55.57 | 0.819          | 0.812                 | 29  | 1.384 |
| Bipolar Disorder                                | 1.178   | 0.353 - 2.002 | 49.30 | 0.423          | 0.403                 | 29  | 1.304 |
| Autism Spectrum Disorder                        | 2.637   | 2.252 - 3.023 | 45.80 | 0.956          | 0.954                 | 29  | 1.256 |
| attention deficit/<br>hyperactivity<br>disorder | 1.895   | 1.470 - 2.319 | 60.96 | 0.891          | 0.887                 | 29  | 1.499 |

**Supplementary Tab. 1 Curve fitting results for exponential function model.** All the data have been undergone centering.

| <b>Journals</b>                                                    | <b>Counts</b> |
|--------------------------------------------------------------------|---------------|
| Plos one                                                           | 28            |
| NeuroImage: Clinical                                               | 22            |
| Human Brain Mapping                                                | 20            |
| Neuroimage                                                         | 20            |
| Front Neurosci                                                     | 16            |
| Front Psychiatry                                                   | 13            |
| Schizophrenia research                                             | 13            |
| Frontiers in Human Neuroscience                                    | 10            |
| Journal of affective disorders                                     | 9             |
| Scientific Report                                                  | 9             |
| Annu Int Conf IEEE Eng Med Biol Soc                                | 8             |
| Brain imaging and behavior                                         | 8             |
| Front Syst Neurosci                                                | 8             |
| Psychological Medicine                                             | 8             |
| Computer Methods and Programs in Biomedicine                       | 7             |
| IEEE TRANSACTIONS ON NEURAL SYSTEMS AND REHABILITATION ENGINEERING | 7             |
| Journal of neuroscience methods                                    | 7             |
| Psychiatry Research: Neuroimaging                                  | 7             |
| Clinical Neurophysiology                                           | 6             |
| Sensors                                                            | 6             |
| Transl Psychiatry                                                  | 6             |
| Clinical EEG and Neuroscience                                      | 5             |
| Artificial Intelligence in Medicine                                | 5             |
| BMC Psychiatry                                                     | 5             |
| J Neural Eng                                                       | 5             |
| Annu Int Conf IEEE Eng Med Biol Soc                                | 4             |
| Brain sciences                                                     | 4             |
| Computerized Medical Imaging and Graphics                          | 4             |
| Neuroscience Letters                                               | 4             |
| Schizophrenia Bulletin                                             | 4             |
| Biol Psychiatry Cogn Neurosci Neuroimaging                         | 3             |
| BioMed research international                                      | 3             |
| Bipolar Disord                                                     | 3             |
| Brain                                                              | 3             |
| Brain and behavior                                                 | 3             |
| Brain connectivity                                                 | 3             |
| Computational and Mathematical Methods in Medicine                 | 3             |
| Conf Proc IEEE Eng Med Biol Soc                                    | 3             |
| Cortex                                                             | 3             |
| IEEE Trans Biomed Eng                                              | 3             |
| International Journal of Neural Systems                            | 3             |
| J Neural Transm (Vienna)                                           | 3             |

|                                                                                                          |   |
|----------------------------------------------------------------------------------------------------------|---|
| Journal of digital imaging                                                                               | 3 |
| Journal of Medical Systems                                                                               | 3 |
| Medical & Biological Engineering & Computing                                                             | 3 |
| Medical image computing and computer-assisted intervention                                               | 3 |
| Neuroreport                                                                                              | 3 |
| NPJ Schizophr                                                                                            | 3 |
| Physical and Engineering Sciences in Medicine                                                            | 3 |
| Psychiatry and clinical neurosciences                                                                    | 3 |
| Psychiatry Research                                                                                      | 3 |
| 2018 40th Annual International Conference of the IEEE Engineering in Medicine and Biology Society (EMBC) | 2 |
| Acta Psychiatrica Scandinavia                                                                            | 2 |
| Addict Biol                                                                                              | 2 |
| Autism Research                                                                                          | 2 |
| Biol Psychiatry                                                                                          | 2 |
| Biomed Engineering Online                                                                                | 2 |
| Br J Psychiatry                                                                                          | 2 |
| Cerebral Cortex                                                                                          | 2 |
| Cognitive Neurodynamics                                                                                  | 2 |
| EBioMedicine                                                                                             | 2 |
| Eur Child Adolesc Psychiatry                                                                             | 2 |
| European Archives of Psychiatry and Clinical Neuroscience                                                | 2 |
| Front Neuroinform.                                                                                       | 2 |
| Frontiers in computational neuroscience                                                                  | 2 |
| IEEE TRANSACTIONS ON CYBERNETICS                                                                         | 2 |
| Int J Methods Psychiatr Res                                                                              | 2 |
| International Journal of Psychophysiology                                                                | 2 |
| International Journal of Neural Systems                                                                  | 2 |
| J Clin Med                                                                                               | 2 |
| JAMA Psychiatry                                                                                          | 2 |
| Journal of Attention Disorders                                                                           | 2 |
| Journal of Child Psychology and Psychiatry                                                               | 2 |
| Journal of Neurodevelopmental Disorders                                                                  | 2 |
| Magnetic Resonance Imaging                                                                               | 2 |
| Neural Networks                                                                                          | 2 |
| Neuropsychopharmacology                                                                                  | 2 |
| Nonlinear biomedical physics                                                                             | 2 |
| Progress in Neuro-Psychopharmacology and Biology pathways                                                | 2 |
| 2014 36th Annual International Conference of the IEEE Engineering in Medicine and Biology Society        | 1 |
| 2020 42nd Annual International Conference of the IEEE Engineering in Medicine & Biology Society (EMBC)   | 1 |
| ACS Chemical Neuroscience                                                                                | 1 |
| Acta Neuropsychiatr                                                                                      | 1 |

|                                                                   |   |
|-------------------------------------------------------------------|---|
| AIMS Neurosci                                                     | 1 |
| Ann Dyslexia                                                      | 1 |
| Australian & New Zealand Journal of Psychiatry                    | 1 |
| Basic Clin Neurosci.                                              | 1 |
| Behav Brain Res                                                   | 1 |
| Behav Neurol                                                      | 1 |
| Bio-Medical Materials and Engineering                             | 1 |
| Biological Psychology                                             | 1 |
| BMC Bioinformatics                                                | 1 |
| BMC medicine                                                      | 1 |
| BMC Neurosci                                                      | 1 |
| BMC Med inform decision making                                    | 1 |
| BMC Neurology                                                     | 1 |
| BMJ open                                                          | 1 |
| BOOK                                                              | 1 |
| Brain research                                                    | 1 |
| Brain Struct Funct                                                | 1 |
| Brain Topogr                                                      | 1 |
| Chaos                                                             | 1 |
| Children (Basel)                                                  | 1 |
| Clin Neurol Neurosurg                                             | 1 |
| Clinical psychological science                                    | 1 |
| Computational Intelligence and Neuroscience                       | 1 |
| Computers in Biology and Medicine                                 | 1 |
| Current Biology                                                   | 1 |
| Disease Markers                                                   | 1 |
| Entropy                                                           | 1 |
| Epilepsia                                                         | 1 |
| Eur J Radiol                                                      | 1 |
| Eur Neuropsychopharmacol                                          | 1 |
| Experimental neurobiology                                         | 1 |
| Front Physiol.                                                    | 1 |
| Frontiers in neural circuits                                      | 1 |
| Heliyon                                                           | 1 |
| ieee access                                                       | 1 |
| IEEE J Biomed Health Inform                                       | 1 |
| IEEE J Transl Eng Health Med                                      | 1 |
| IEEE Transactions on Neural Networks and Learning Systems         | 1 |
| Int J Eat Disord.                                                 | 1 |
| International journal of environmental research and public health | 1 |
| International journal of geriatric psychiatry                     | 1 |
| J Magn Reson Imaging                                              | 1 |
| J Neuroimaging                                                    | 1 |
| Journal of Clinical Neurophysiology                               | 1 |

---

|                                                                  |   |
|------------------------------------------------------------------|---|
| JOURNAL OF COMPUTATIONAL BIOLOGY                                 | 1 |
| Journal of Integrative Neuroscience                              | 1 |
| Journal of Medical Signals and Sensors                           | 1 |
| Journal of personalized medicine                                 | 1 |
| Journal of Psychiatric Research                                  | 1 |
| Journal of the American Academy of Child & Adolescent Psychiatry | 1 |
| Lancet Psychiatry                                                | 1 |
| Med Eng Phys                                                     | 1 |
| Medical Image Analysis                                           | 1 |
| Medical physics                                                  | 1 |
| Medicine (Baltimore)                                             | 1 |
| Molecular Autism                                                 | 1 |
| Nat Med                                                          | 1 |
| Nature communication                                             | 1 |
| Neural Plast                                                     | 1 |
| Neuroinformatics                                                 | 1 |
| Neurophotonics                                                   | 1 |
| Neuropsychiatr Dis Treat.                                        | 1 |
| Neuropsychiatr Electrophysiol                                    | 1 |
| Neuroscience                                                     | 1 |
| PeerJ                                                            | 1 |
| Physiol Meas                                                     | 1 |
| PLOS BIOL                                                        | 1 |
| Proc IEEE Int Symp Biomed Imaging.                               | 1 |
| Proc Inst Mech Eng H                                             | 1 |
| Psychophysiology                                                 | 1 |
| Radiol Artif Intell                                              | 1 |
| Radiology                                                        | 1 |
| Social cognitive and affective neuroscience                      | 1 |
| Social Neuroscience                                              | 1 |
| World J Biol Psychiatry                                          | 1 |

---

**Supplementary Tab. 2 Journals counts for papers aiming at neuropsychiatric diagnostic prediction (classification).**

| <b>Countries or regions</b> | <b>Counts</b> |
|-----------------------------|---------------|
| China                       | 136           |
| USA                         | 102           |
| Canada                      | 24            |
| Korea                       | 23            |
| UK                          | 21            |
| Germany                     | 20            |
| Iran                        | 17            |
| Japan                       | 16            |
| Spain                       | 13            |
| Italy                       | 12            |
| Brazil                      | 9             |
| Singapore                   | 8             |
| Taiwan                      | 8             |
| Malaysia                    | 7             |
| Switzerland                 | 7             |
| India                       | 6             |
| Netherlands                 | 6             |
| Turkey                      | 6             |
| Australia                   | 5             |
| Czech                       | 3             |
| Greece                      | 3             |
| Norway                      | 3             |
| Chile                       | 2             |
| Iceland                     | 2             |
| Saudi Arabia                | 2             |
| Sweden                      | 2             |
| Belgium                     | 1             |
| Cyprus                      | 1             |
| Denmark                     | 1             |
| Finland                     | 1             |
| France                      | 1             |
| Hungary                     | 1             |
| Ireland                     | 1             |
| Israel                      | 1             |
| Poland                      | 1             |
| Portugal                    | 1             |
| Republic of Macedonia       | 1             |
| Romania                     | 1             |
| South Africa                | 1             |

**Supplementary Tab. 3 Counts for contributors' sources for these papers.**

| Countries or regions | No. of studies | No. of participants |
|----------------------|----------------|---------------------|
| China                | 121            | 14869               |
| USA                  | 134            | 12024               |
| Germany              | 17             | 4330                |
| Japan                | 10             | 2935                |
| Korea                | 15             | 1744                |
| Italy                | 13             | 1466                |
| Taiwan               | 8              | 884                 |
| Czech                | 3              | 864                 |
| Norway               | 3              | 848                 |
| Canada               | 9              | 819                 |
| Switzerland          | 6              | 785                 |
| Netherlands          | 8              | 670                 |
| Spain                | 10             | 641                 |
| Iceland              | 1              | 630                 |
| UK                   | 13             | 605                 |
| Brazil               | 5              | 584                 |
| Malaysia             | 8              | 439                 |
| Iran                 | 10             | 401                 |
| Turkey               | 6              | 394                 |
| India                | 4              | 362                 |
| Australia            | 7              | 306                 |
| Singapore            | 2              | 188                 |
| Ireland              | 3              | 187                 |
| Macedonia            | 1              | 177                 |
| Hungary              | 1              | 145                 |
| Romania              | 1              | 128                 |
| Denmark              | 1              | 104                 |
| Belgium              | 3              | 92                  |
| Jordan               | 1              | 77                  |
| Sweden               | 2              | 71                  |
| Columbia             | 1              | 60                  |
| France               | 1              | 56                  |
| Greece               | 2              | 54                  |
| Poland               | 2              | 28                  |
| Saudi Arabia         | 2              | 19                  |

**Supplementary Tab. 4 Summary for sample population for these papers in the world.** No. of participants have been adjusted by reproducible counts, such as reuse data and open data repository.

| <b>Sample site in U.S.</b> | <b>No. of studies</b> | <b>No. of participants</b> |
|----------------------------|-----------------------|----------------------------|
| California                 | 30                    | 2326                       |
| Pennsylvania               | 9                     | 1897                       |
| New York                   | 10                    | 1063                       |
| Illinois                   | 7                     | 990                        |
| Connecticut                | 13                    | 964                        |
| Maryland                   | 7                     | 951                        |
| Texas                      | 9                     | 829                        |
| Massachusetts              | 6                     | 541                        |
| Missouri                   | 2                     | 526                        |
| Kentucky                   | 4                     | 511                        |
| New Mexico                 | 2                     | 407                        |
| Michigan                   | 5                     | 367                        |
| Washington                 | 4                     | 342                        |
| Utah                       | 3                     | 214                        |
| Oregon                     | 3                     | 200                        |
| Minnesota                  | 5                     | 199                        |
| Indiana                    | 2                     | 88                         |
| Rhode Island               | 2                     | 83                         |
| North Carolina             | 2                     | 80                         |
| New Jersey                 | 1                     | 72                         |
| Ohio                       | 1                     | 50                         |
| Colorado                   | 1                     | 48                         |
| Georgia                    | 1                     | 40                         |
| Tennessee                  | 1                     | 30                         |
| Alabama                    | 1                     | 27                         |

**Supplementary Tab. 5 Summary for sample population for these papers in the U.S.** No. of participants have been adjusted by reproducible counts, such as reuse data and open data repository.



| <b>Sample site in China (including Taiwan area)</b> | <b>No. of studies</b> | <b>No. of participants</b> |
|-----------------------------------------------------|-----------------------|----------------------------|
| Beijing                                             | 17                    | 4515                       |
| Sichuan                                             | 15                    | 2208                       |
| Hunan                                               | 20                    | 1382                       |
| JiangSu                                             | 14                    | 1161                       |
| Taiwan                                              | 8                     | 884                        |
| Chongqing                                           | 4                     | 723                        |
| Shandong                                            | 2                     | 673                        |
| GuangDong                                           | 5                     | 630                        |
| ShanXi(South)                                       | 1                     | 414                        |
| Tianjing                                            | 3                     | 361                        |
| Zhejiang                                            | 2                     | 354                        |
| Henan                                               | 3                     | 300                        |
| ShanXi(North)                                       | 6                     | 281                        |
| Liaoning                                            | 1                     | 189                        |
| Shanghai                                            | 7                     | 185                        |
| Ningxia                                             | 2                     | 165                        |
| Yunnan                                              | 2                     | 158                        |
| Fujian                                              | 1                     | 90                         |
| Anhui                                               | 1                     | 87                         |
| Heilongjiang                                        | 1                     | 75                         |

**Supplementary Tab. 6 Summary for sample population for these papers in the China (including Taiwan area)** No. of participants have been adjusted by reproducible counts, such as reuse data and open data repository.

| <b>Sample site in Germany</b> | <b>No. of studies</b> | <b>No. of participants</b> |
|-------------------------------|-----------------------|----------------------------|
| Jülich                        | 3                     | 918                        |
| Berlin                        | 4                     | 601                        |
| Aachen                        | 2                     | 378                        |
| Dresden                       | 1                     | 254                        |
| Heidelberg                    | 1                     | 154                        |
| Frankfurt am Main             | 1                     | 21                         |

**Supplementary Tab. 7 Summary for sample population for these papers in the Germany** No. of participants have been adjusted by reproducible counts, such as reuse data and open data repository.

| <b>Sample site in U.K.</b> | <b>No. of studies</b> | <b>No. of participants</b> |
|----------------------------|-----------------------|----------------------------|
| London                     | 8                     | 388                        |
| Cardiff                    | 1                     | 83                         |
| Aberdeen/Edinburgh         | 1                     | 62                         |
| Dundee                     | 1                     | 41                         |
| Birmingham                 | 1                     | 37                         |
| Southampton                | 1                     | 24                         |

**Supplementary Tab. 8 Summary for sample population for these papers in the U.K.** No. of participants have been adjusted by reproducible counts, such as reuse data and open data repository.

| <b>Country (Regions)</b> | <b>Gini coefficient</b> | <b>Theil index</b> | <b>P value</b> |
|--------------------------|-------------------------|--------------------|----------------|
| Globe                    | 0.810                   | 1.537              | < .001         |
| LEDC                     | 0.936                   | 1.885              | < .001         |
| MEDC                     | 0.334                   | 0.408              | < .001         |
| Iran                     | 0.922                   | 2.342              | < .001         |
| Germany                  | 0.784                   | 1.296              | < .001         |
| China                    | 0.471                   | 0.548              | < .001         |
| Italy                    | 0.742                   | 1.236              | < .001         |
| Japan                    | 0.915                   | 2.242              | < .001         |
| Korea                    | 0.855                   | 1.732              | < .001         |
| Spain                    | 0.912                   | 2.204              | < .001         |
| U.K.                     | 0.876                   | 1.991              | < .001         |
| U.S.                     | 0.577                   | 0.742              | < .001         |

**Supplementary Tab. 9 Sampling inequalities for globe and countries/regions.** Permutation test is used for statistical inference to compared with null distribution. LEDC = Less Economic Development Countries; MEDC = More Economic Development Countries; U.K. = United Kingdom; U.S. = United States

| Continents    | No. of participants | Total population    | Proportion of sample  | Gini coefficient |
|---------------|---------------------|---------------------|-----------------------|------------------|
| Asia          | 21,860              | $41.64 \times 10^8$ | $0.52 \times 10^{-5}$ | 0.826            |
| Europe        | 11,134              | $7.40 \times 10^8$  | $0.15 \times 10^{-5}$ | 0.636            |
| North America | 12,843              | $5.28 \times 10^8$  | $0.24 \times 10^{-5}$ | 0.920            |
| South America | 1,636               | $4.34 \times 10^8$  | $0.03 \times 10^{-5}$ | 0.886            |
| Oceania       | 306                 | $0.29 \times 10^8$  | $1.05 \times 10^{-5}$ | 0.937            |
| Africa        | -                   | -                   | -                     | -                |

**Supplementary Tab. 10 Sampling inequalities for continents.** Proportion of sample was used to adjust the number of participants who used for training ML models by total number of population in each continent. Total number of population in each continent was referred from Department of Economic and Social Affairs at United Nations (UN) (2019 Revision of World Population Prospects, <https://population.un.org/wpp/>)

| Countries | Gini  | Theil | GDP   | HDI   | GEE (%) | MHDB (%) | R&D (%) |
|-----------|-------|-------|-------|-------|---------|----------|---------|
| Iran      | 0.922 | 2.342 | 0.203 | 0.783 | 3.96    | 10.31    | 0.83    |
| Germany   | 0.784 | 1.296 | 3.85  | 0.947 | 4.91    | 6.43     | 3.13    |
| China     | 0.471 | 0.548 | 14.72 | 0.761 | 3.51    | 5.3      | 2.14    |
| Italy     | 0.742 | 1.236 | 1.89  | 0.892 | 4.04    | 7.15     | 1.39    |
| Japan     | 0.915 | 2.242 | 5.06  | 0.919 | 3.18    | 4.91     | 3.28    |
| Korea     | 0.855 | 1.732 | 1.64  | 0.916 | 5.31    | 5.23     | 4.53    |
| Spain     | 0.912 | 2.204 | 1.28  | 0.904 | 4.21    | 8.68     | 1.24    |
| U.K.      | 0.876 | 1.991 | 2.76  | 0.932 | 5.44    | 7.12     | 1.7     |
| U.S.      | 0.577 | 0.742 | 20.95 | 0.926 | 4.391   | 6.56     | 2.83    |

**Supplementary Tab. 11 Sampling inequalities and national development index.** GDP = Gross Domestic Product; HDI = Human Development Index; GEE = total government expenditure on public education; MHDB = mental health diseases burden; R & D = research and development expenditure.

| Time             | Median   | Mean    | S-W test | Min | Max  | Skew |
|------------------|----------|---------|----------|-----|------|------|
| 2011             | 40.00    | 53.38   | 0.87***  | 10  | 105  | 1.30 |
| 2012             | 68.00    | 222.17  | 0.68***  | 24  | 1026 | 0.58 |
| 2013             | 54.00    | 100.87  | 0.33***  | 24  | 964  | 4.47 |
| 2014             | 59.75    | 102.93  | 0.68***  | 23  | 450  | 2.07 |
| 2015             | 48.00    | 136.46  | 0.54***  | 10  | 1008 | 0.95 |
| 2016             | 104.00   | 177.01  | 0.62***  | 22  | 888  | 0.46 |
| 2017             | 74.00    | 139.51  | 0.63***  | 17  | 1032 | 3.47 |
| 2018             | 125.25   | 238.62  | 0.72***  | 14  | 941  | 1.63 |
| 2019             | 108.00   | 238.10  | 0.59***  | 12  | 2004 | 2.91 |
| 2020             | 128.00   | 394.33  | 0.53***  | 19  | 4372 | 4.14 |
| $r$ (Pearson)    | 0.860*** | 0.748*  |          |     |      |      |
| BF <sub>10</sub> | 31.38    | 5.826   |          |     |      |      |
| $r$ (Spearman)   | 0.867**  | 0.794** |          |     |      |      |
| BF <sub>10</sub> | 11.203   | 11.203  |          |     |      |      |

**Supplementary Tab. 12 Sample size during recent decade for all the studies.** S-W test means Shapiro-Wilk test to examine whether the distribution of data is in accordance with Gaussian shape. \*  $p < .05$ , \*\*  $p < .01$ , \*\*\*  $p < .001$ .

| Time             | Median   | Mean     | S-W test | Min | Max  | Skew |
|------------------|----------|----------|----------|-----|------|------|
| 2011             | 40.00    | 54.29    | 0.85**   | 10  | 150  | 1.24 |
| 2012             | 53.00    | 60.53    | 0.84***  | 24  | 113  | 0.67 |
| 2013             | 50.00    | 50.24    | 0.93     | 24  | 82   | 0.05 |
| 2014             | 53.00    | 56.76    | 0.85*    | 24  | 132  | 1.43 |
| 2015             | 40.00    | 75.90    | 0.38***  | 10  | 630  | 4.32 |
| 2016             | 74.00    | 92.78    | 0.90*    | 22  | 216  | 0.73 |
| 2017             | 64.00    | 111.00   | 0.75***  | 17  | 374  | 1.49 |
| 2018             | 79.00    | 94.41    | 0.90     | 14  | 225  | 1.14 |
| 2019             | 92.50    | 115.43   | 0.51***  | 12  | 935  | 4.81 |
| 2020             | 95.00    | 168.38   | 0.66***  | 20  | 1100 | 2.85 |
| $r$ (Pearson)    | 0.891*** | 0.901*** |          |     |      |      |
| BF <sub>10</sub> | 87.66    | 87.66    |          |     |      |      |
| $r$ (Spearman)   | 0.872*** | 0.822*** |          |     |      |      |
| BF <sub>10</sub> | 44.01    | 44.01    |          |     |      |      |

**Supplementary Tab. 13 Sample size during recent decade for studies using self-recruiting sample.** S-W test means Shapiro-Wilk test to examine whether the distribution of data is in accordance with Gaussian shape. \*  $p < .05$ , \*\*  $p < .01$ , \*\*\*  $p < .001$ .



| Time             | Median   | Mean     | S-W test | Min | Max  | Skew  |
|------------------|----------|----------|----------|-----|------|-------|
| 2011             | 53.50    | 50.50    | 0.89     | 20  | 75   | -0.31 |
| 2012             | 626.00   | 544.20   | 0.92     | 58  | 1026 | -0.33 |
| 2013             | 90.00    | 251.60   | 0.61***  | 46  | 964  | 2.21  |
| 2014             | 94.00    | 178.09   | 0.86     | 23  | 450  | 0.66  |
| 2015             | 173.00   | 306.12   | 0.77     | 38  | 1008 | 1.61  |
| 2016             | 180.50   | 344.10   | 0.78     | 60  | 888  | 0.92  |
| 2017             | 114.00   | 189.00   | 0.65***  | 19  | 1032 | 2.80  |
| 2018             | 193.00   | 333.59   | 0.81***  | 24  | 941  | 0.89  |
| 2019             | 222.00   | 459.04   | 0.78***  | 30  | 2004 | 1.62  |
| 2020             | 219.00   | 603.63   | 0.61***  | 19  | 4372 | 3.11  |
| $r$ (Pearson)    | 0.890*** | 0.858*** |          |     |      |       |
| BF <sub>10</sub> | 32.26    | 16.78    |          |     |      |       |
| $r$ (Spearman)   | 0.833*** | 0.722**  |          |     |      |       |
| BF <sub>10</sub> | 26.03    | 9.57     |          |     |      |       |

**Supplementary Tab. 14 Sample size during recent decade for studies using open dataset.** S-W test means Shapiro-Wilk test to examine whether the distribution of data is in accordance with Gaussian shape. \*  $p < .05$ , \*\*  $p < .01$ , \*\*\*  $p < .001$ .

| <b>Sample size (No. of participants)</b> | <b>No. of Studies</b> | <b>Proportion (%)</b> |
|------------------------------------------|-----------------------|-----------------------|
| <100                                     | 248                   | 52.94                 |
| 101-200                                  | 100                   | 21.05                 |
| 201-300                                  | 38                    | 7.36                  |
| 301-400                                  | 21                    | 4.42                  |
| 401-500                                  | 6                     | 1.26                  |
| 501-600                                  | 7                     | 1.47                  |
| 601-700                                  | 4                     | 0.84                  |
| 701-800                                  | 14                    | 2.94                  |
| 801-900                                  | 9                     | 1.83                  |
| 901-1000                                 | 4                     | 0.84                  |
| >1000                                    | 24                    | 5.05                  |

**Supplementary Tab. 15 Sample size during recent three decades in the current study.**

| <b>Algorithms (Classifiers)</b>                    | <b>No. of Studies</b> | <b>Proportion (%)</b> |
|----------------------------------------------------|-----------------------|-----------------------|
| Support Vector Machine, SVM                        | 254                   | 53.36134454           |
| Convolutional Neural Network, CNN                  | 37                    | 7.773109244           |
| Random Forest, RF                                  | 19                    | 3.991596639           |
| Gaussian Process Classifier, GPC                   | 15                    | 3.151260504           |
| Linear Discriminant Analysis, LDA                  | 14                    | 2.941176471           |
| Artificial Neural Network, ANN                     | 10                    | 2.100840336           |
| Clustering                                         | 10                    | 2.100840336           |
| Deep Neural Network, DNN                           | 10                    | 2.100840336           |
| Logistic Regression Classifier, LRC                | 10                    | 2.100840336           |
| K-Nearest Neighbor, KNN                            | 5                     | 1.050420168           |
| LASSO Classifier                                   | 5                     | 1.050420168           |
| Self-made Unnamed Classifier                       | 5                     | 1.050420168           |
| Decision Tree, DT                                  | 4                     | 0.840336134           |
| Probabilistic Neural Network, PNN                  | 4                     | 0.840336134           |
| Relevant Vector Machine, RVM                       | 4                     | 0.840336134           |
| XGBoost                                            | 4                     | 0.840336134           |
| Deep Brief Network, DBN                            | 3                     | 0.630252101           |
| Recursive Neural Network, RNN                      | 3                     | 0.630252101           |
| Convolutional Denoising                            |                       |                       |
|                                                    | 2                     | 0.420168067           |
| Autoencoder, CDAE                                  |                       |                       |
| Elastic Net, EN                                    | 2                     | 0.420168067           |
| Graph Convolutional Networks, GCN                  | 2                     | 0.420168067           |
| Quadratic Discriminant Analysis, QDA               | 2                     | 0.420168067           |
| Short-term Memory Network, LSTM                    | 2                     | 0.420168067           |
| Simple Linear Regression, SLR                      | 2                     | 0.420168067           |
| AlexNet                                            | 1                     | 0.210084034           |
| ASD-DiagNet                                        | 1                     | 0.210084034           |
| Discriminant Deep Learning, DANS                   | 1                     | 0.210084034           |
| Deep Autoencoder, DA                               | 1                     | 0.210084034           |
| Deep Transfer Learning Neural Network, DTLNN       | 1                     | 0.210084034           |
| Deep Learning, DL                                  | 1                     | 0.210084034           |
| DL-DeepfMRI                                        | 1                     | 0.210084034           |
| DL-EEGNet                                          | 1                     | 0.210084034           |
| Discriminative Restricted Boltzmann machines, DRBM | 1                     | 0.210084034           |
| Dual Subspace Learning, DSL                        | 1                     | 0.210084034           |
| Empirical Mode Decomposition, EBT                  | 1                     | 0.210084034           |
| Extreme Learning Machine, EML                      | 1                     | 0.210084034           |
| EMPaSchiz                                          | 1                     | 0.210084034           |
| Ensemble                                           | 1                     | 0.210084034           |

|                                                                    |   |             |
|--------------------------------------------------------------------|---|-------------|
| Generative Adversarial Networks, GAN                               | 1 | 0.210084034 |
| Gradient Boosting Decision Tree, GBDT                              | 1 | 0.210084034 |
| Gaussian Mixed Model, GMM                                          | 1 | 0.210084034 |
| Graph Neural Network, GNN                                          | 1 | 0.210084034 |
| Hierarchical Clustering, HC                                        | 1 | 0.210084034 |
| Nonlinear Manifold Learning Algorithms, ISOMAP                     | 1 | 0.210084034 |
| Kernel Discriminant Analysis, KDA                                  | 1 | 0.210084034 |
| L1-norm Regularized Sparse Canonical Correlation Analysis, L1-SCCA | 1 | 0.210084034 |
| L2-norm Linear Regression, L2-LR                                   | 1 | 0.210084034 |
| Automatic Bayesian Classification, ABC                             | 1 | 0.210084034 |
| Locally Linear Embedding, LLE                                      | 1 | 0.210084034 |
| Multiple Kernel Learning Classifier, MKL                           | 1 | 0.210084034 |
| Multiple Learning Process , MLP                                    | 1 | 0.210084034 |
| Modified Adaboost Classification, MAC                              | 1 | 0.210084034 |
| Multistage Algorithm, MA                                           | 2 | 0.420168067 |
| Unnamed Neural network                                             | 1 | 0.210084034 |
| PBL-McRBFN                                                         | 1 | 0.210084034 |
| Penalized Regression Model, PRM                                    | 1 | 0.210084034 |
| Radial Basis Function Neural                                       |   |             |
|                                                                    | 2 | 0.420168067 |
| Network, RBFNN                                                     |   |             |
| ResNet-50                                                          | 1 | 0.210084034 |
| Robust interdependence measure, RIM                                | 1 | 0.210084034 |
| Sparse hypergraph learning, STM                                    | 1 | 0.210084034 |
| Symmetrical Uncertainty, SU                                        | 1 | 0.210084034 |
| Transductive Classifier, TC                                        | 1 | 0.210084034 |
| Unambiguous Component with Maximum Correlation, UMAX               | 1 | 0.210084034 |

**Supplementary Tab. 16 Summary for what models (algorithms) were built for neuropsychiatric diagnostic prediction in existing studies.**

| <b>Cross-validation scheme</b> | <b>No. of Studies</b> | <b>Proportion (%)</b> |
|--------------------------------|-----------------------|-----------------------|
| 10-fold CV                     | 132                   | 27.7310924            |
| 5-fold CV                      | 36                    | 7.5630252             |
| k-fold CV ( $n \neq 5$ or 10)  | 15                    | 3.1512605             |
| hold-out CV                    | 24                    | 5.0420168             |
| LORO CV                        | 1                     | 0.210084              |
| LOPO CV                        | 12                    | 2.5210084             |
| LOsiteO CV                     | 14                    | 2.9411765             |
| LOSO CV                        | 182                   | 38.2352941            |
| nested 10-fold CV              | 11                    | 2.3109244             |
| nested 5-fold CV               | 1                     | 0.0210084             |
| nested k-fold CV               | 6                     | 1.2605042             |
| nested LOSO CV                 | 10                    | 2.1008403             |
| Others                         | 34                    | 7.1428571             |

**Supplementary Tab. 17 Summary for what cross-validation (CV) schemes were used to estimate model performance.** LORO = leave-one-run-out; LOPO = leave-one-pair-out; LOsiteO = leave-one-site-out; LOSO = leave-one-subject-out.

| <b>Feature selection</b>                             | <b>No. of Studies</b> | <b>Proportion (%)</b> |
|------------------------------------------------------|-----------------------|-----------------------|
| No feature selection                                 | 122                   | 25.6302521            |
| Univariate analysis                                  | 56                    | 11.76470588           |
| PCA                                                  | 41                    | 8.613445378           |
| RFE                                                  | 29                    | 6.092436975           |
| LASSO                                                | 23                    | 4.831932773           |
| ICA                                                  | 19                    | 3.991596639           |
| Kendall tau rank                                     | 8                     | 1.680672269           |
| Fisher z score                                       | 7                     | 1.470588235           |
| MRMR                                                 | 7                     | 1.470588235           |
| F-score                                              | 6                     | 1.260504202           |
| ROI                                                  | 5                     | 1.050420168           |
| Discrete wavelet transforms                          | 4                     | 0.840336134           |
| L2                                                   | 4                     | 0.840336134           |
| Minimum redundancy and maximum relevance (mRMR)      | 4                     | 0.840336134           |
| Rank-based feature selection                         | 4                     | 0.840336134           |
| Autoencoder (AE)                                     | 3                     | 0.630252101           |
| Dual Regression ICA                                  | 3                     | 0.630252101           |
| Elastic Net                                          | 3                     | 0.630252101           |
| Forward stepwise analyses                            | 3                     | 0.630252101           |
| GLM                                                  | 3                     | 0.630252101           |
| Max-pooling                                          | 3                     | 0.630252101           |
| Sequential forward feature selection (SFFS)          | 3                     | 0.630252101           |
| SVD                                                  | 3                     | 0.630252101           |
| Wrapping                                             | 3                     | 0.630252101           |
| Genetic algorithm                                    | 2                     | 0.420168067           |
| GGLM                                                 | 2                     | 0.420168067           |
| K-S test                                             | 2                     | 0.420168067           |
| LDA                                                  | 2                     | 0.420168067           |
| Relief algorithm                                     | 2                     | 0.420168067           |
| Self-made                                            | 2                     | 0.420168067           |
| SVM                                                  | 2                     | 0.420168067           |
| 2-stage PCA                                          | 1                     | 0.210084034           |
| 2D convolution kernel                                | 1                     | 0.210084034           |
| AM_FM                                                | 1                     | 0.210084034           |
| ApEn                                                 | 1                     | 0.210084034           |
| AR                                                   | 1                     | 0.210084034           |
| Backward elimination                                 | 1                     | 0.210084034           |
| Block                                                | 1                     | 0.210084034           |
| BSL                                                  | 1                     | 0.210084034           |
| BWAS                                                 | 1                     | 0.210084034           |
| CART (Classification and Regression Trees) algorithm | 1                     | 0.210084034           |

---

|                                               |   |             |
|-----------------------------------------------|---|-------------|
| CBAN                                          | 1 | 0.210084034 |
| CCA+Pearson graph matching sparse group lasso | 1 | 0.210084034 |
| CFS reduction                                 | 1 | 0.210084034 |
| COMPARE                                       | 1 | 0.210084034 |
| Connections of interest (COIs)                | 1 | 0.210084034 |
| Consensus                                     | 1 | 0.210084034 |
| Cosine algorithm                              | 1 | 0.210084034 |
| CRF-based dimension reduction algorithm       | 1 | 0.210084034 |
| Dimension Reduction                           | 1 | 0.210084034 |
| Distance                                      | 1 | 0.210084034 |
| DoG                                           | 1 | 0.210084034 |
| Eeset                                         | 1 | 0.210084034 |
| Elman Neural Network                          | 1 | 0.210084034 |
| EMB                                           | 1 | 0.210084034 |
| Empirical mode decomposition                  | 1 | 0.210084034 |
| Ensemble feature selection                    | 1 | 0.210084034 |
| Extra-Trees                                   | 1 | 0.210084034 |
| Factor-based feature extraction               | 1 | 0.210084034 |
| FAE                                           | 1 | 0.210084034 |
| FBM                                           | 1 | 0.210084034 |
| FDR                                           | 1 | 0.210084034 |
| Filter Bank Common Spatial Patterns           | 1 | 0.210084034 |
| GABM                                          | 1 | 0.210084034 |
| GAD                                           | 1 | 0.210084034 |
| Graph-Based Feature Selection                 | 1 | 0.210084034 |
| Greedy                                        | 1 | 0.210084034 |
| Grey level co-occurrence matrix               | 1 | 0.210084034 |
| HOG                                           | 1 | 0.210084034 |
| ICA-ICN                                       | 1 | 0.210084034 |
| Information Gain                              | 1 | 0.210084034 |
| Inter-ICN                                     | 1 | 0.210084034 |
| Kernel PCA                                    | 1 | 0.210084034 |
| Kernel Principal Component Analysis           | 1 | 0.210084034 |
| KW test                                       | 1 | 0.210084034 |
| LAAM                                          | 1 | 0.210084034 |
| latent variable                               | 1 | 0.210084034 |
| LBP-TOP                                       | 1 | 0.210084034 |
| LICA                                          | 1 | 0.210084034 |
| LLE                                           | 1 | 0.210084034 |
| Low Frequency Components                      | 1 | 0.210084034 |
| MDA(mean decrease in accuracy)                | 1 | 0.210084034 |
| MDS                                           | 1 | 0.210084034 |
| Modified multiscale entropy                   | 1 | 0.210084034 |
| Motif configurations                          | 1 | 0.210084034 |

|                                                 |   |             |
|-------------------------------------------------|---|-------------|
| mSVM-RFE                                        | 1 | 0.210084034 |
| Multiple-task logistic regression               | 1 | 0.210084034 |
| MVAR model                                      | 1 | 0.210084034 |
| N2EN                                            | 1 | 0.210084034 |
| Nested feature-selection                        | 1 | 0.210084034 |
| Network sparsity                                | 1 | 0.210084034 |
| NSD                                             | 1 | 0.210084034 |
| Joint distribution adaptation (JDA) method      | 1 | 0.210084034 |
| PDA                                             | 1 | 0.210084034 |
| PDF-FS                                          | 1 | 0.210084034 |
| peak                                            | 1 | 0.210084034 |
| Pegosos                                         | 1 | 0.210084034 |
| pLDA                                            | 1 | 0.210084034 |
| PLI                                             | 1 | 0.210084034 |
| PS assessment                                   | 1 | 0.210084034 |
| RADACC, RADMPL, and AD(average degree)          | 1 | 0.210084034 |
| Random forest-based feature selection           | 1 | 0.210084034 |
| R-SFM                                           | 1 | 0.210084034 |
| ReliefF                                         | 1 | 0.210084034 |
| ResNet50                                        | 1 | 0.210084034 |
| ROC                                             | 1 | 0.210084034 |
| SBE                                             | 1 | 0.210084034 |
| Sequential minimal optimization (SMO)           | 1 | 0.210084034 |
| SFS                                             | 1 | 0.210084034 |
| Short time series selection                     | 1 | 0.210084034 |
| SNV+PCA                                         | 1 | 0.210084034 |
| Sparse logistic regression (SLR)                | 1 | 0.210084034 |
| Stepwise analysis                               | 1 | 0.210084034 |
| Symmetrical Uncertainty (SU)                    | 1 | 0.210084034 |
| Task comparison                                 | 1 | 0.210084034 |
| The multi scale ranked organizing maps (MS-ROM) | 1 | 0.210084034 |
| Top-k-feature-set                               | 1 | 0.210084034 |
| Units representing features                     | 1 | 0.210084034 |
| VGG16 model                                     | 1 | 0.210084034 |
| Subject Weights                                 | 1 | 0.210084034 |

**Supplementary Tab. 18 Summary for feature selection methods in existing studies.** Almost methods were created originally, and thus provided self-defined name. More details for these methods can be found elsewhere in corresponding paper.



| <b>Neural modality (features)</b> | <b>No. of Studies</b> | <b>Proportion (%)</b> |
|-----------------------------------|-----------------------|-----------------------|
| Functional MRI (rsFC)             | 158                   | 33.19327731           |
| Fusion (multiple neural modality) | 101                   | 21.21848739           |
| EEG/ERP                           | 99                    | 20.79831933           |
| Functional MRI (Task)             | 32                    | 6.722689076           |
| Structural MRI (DWI)              | 27                    | 5.672268908           |
| Structural MRI (GMV)              | 18                    | 3.781512605           |
| fNIRS                             | 12                    | 2.521008403           |
| MEG                               | 9                     | 1.890756303           |
| Functional MRI (Local features)   | 11                    | 2.310924369           |
| Functional MRI (PSD)              | 2                     | 0.420168067           |
| MRI (ASL)                         | 4                     | 0.084033613           |
| SPECT                             | 1                     | 0.210084034           |

**Supplementary Tab. 19 Summary for what neural features (modality) were used in existing studies.** rsFC = resting-state functional connectivity; EEG = electroencephalogram/event-related potentials; DWI = diffusion weighted image; GMV = grey matter volumes; fNIRS = functional near-infrared spectroscopy; MEG = magnetoencephalogram; Local features = Reho, fALFF, ALFF and so on; PSD = power spectral density; ASL = arterial spin labeling; SPECT = single photon emission computed tomography.

| <b>Pre-processing methods</b> | <b>No. of Studies</b> | <b>Proportion (%)</b> |
|-------------------------------|-----------------------|-----------------------|
| None                          | 278                   | 58.40336134           |
| Normalization                 | 123                   | 25.84033613           |
| Fisher Z                      | 52                    | 10.92436975           |
| Scaling                       | 9                     | 1.890756303           |
| Standardization               | 3                     | 0.630252101           |
| L1 or L2                      | 2                     | 0.420168067           |
| Regressed residual            | 2                     | 0.420168067           |
| 0-1 Normalization             | 1                     | 0.210084034           |
| LeFMSF                        | 1                     | 0.210084034           |
| Centering                     | 1                     | 0.210084034           |
| GSP                           | 1                     | 0.210084034           |
| HOG                           | 1                     | 0.210084034           |
| Median                        | 1                     | 0.210084034           |
| PLI                           | 1                     | 0.210084034           |

**Supplementary Tab. 20 Summary for what pre-processing methods were used in existing studies.** A portion of pre-processing methods were developed originally in corresponding studies, which can be found elsewhere for details.

| Years  | No. of open dataset | No. of studies | Proportion (%) |            |
|--------|---------------------|----------------|----------------|------------|
| 2011*  |                     | 0              | 31             | 0          |
| 2012   |                     | 8              | 29             | 27.5862069 |
| 2013   |                     | 4              | 19             | 21.0526316 |
| 2014   |                     | 6              | 28             | 21.4285714 |
| 2015   |                     | 6              | 29             | 20.6896552 |
| 2016   |                     | 10             | 29             | 34.4827586 |
| 2017   |                     | 16             | 47             | 34.0425532 |
| 2018   |                     | 21             | 44             | 47.7272727 |
| 2019   |                     | 20             | 70             | 28.5714286 |
| 2020   |                     | 36             | 99             | 36.3636364 |
| 2021** |                     | 28             | 51             | 54.9019608 |

**Supplementary Tab. 21 Trends for the ratio of using open dataset on training ML models.** \* indicated the total counts during 1990 to 2011; \*\* represented this data is retrieved in July, 2021.

|        | Test         | Statistics | Cohen d | 95% CI      | BF <sub>10</sub> |
|--------|--------------|------------|---------|-------------|------------------|
| Fold 1 | Student      | 3.825***   | 0.663   | 0.31 - 1.01 | 115.29           |
|        | Mann-Whitney | 3028***    | 0.370   | 0.18 - 0.52 | 444.10           |
| Fold 2 | Student      | 4.57***    | 0.793   | 0.40 - 1.14 | 1555.07          |
|        | Mann-Whitney | 3234***    | 0.463   | 0.30 - 0.60 | 1423.78          |
| Fold 3 | Student      | 5.331***   | 0.924   | 0.56 - 1.28 | 31647.5          |
|        | Mann-Whitney | 3616***    | 0.635   | 0.50 - 0.74 | 5087.73          |
| Fold 4 | Student      | 4.446***   | 0.854   | 0.45 - 1.24 | 881.52           |
|        | Mann-Whitney | 2513***    | 0.655   | 0.51 - 0.76 | 1423.71          |

**Supplementary Tab. 22 Results for comparison between SVM and DL classifiers on model performance.** Results for Bayesian Mann-Whitney tests were based on augmentation algorithm with 5 chains of 1000 iteration. \*  $p < .05$ , \*\*  $p < .01$ , \*\*\*  $p < .001$

|        | Test         | Statistics | Cohen d | 95% CI      | BF <sub>10</sub>       |
|--------|--------------|------------|---------|-------------|------------------------|
| Fold 1 | Student      | 3.559***   | 0.610   | 0.26 - 0.95 | 50.19                  |
|        | Mann-Whitney | 3042***    | 0.320   | 0.13 - 0.48 | 19.18                  |
| Fold 2 | Student      | 5.096***   | 0.874   | 0.52 - 1.23 | 12341                  |
|        | Mann-Whitney | 3806***    | 0.646   | 0.52 - 0.75 | 11156                  |
| Fold 3 | Student      | 4.949***   | 0.849   | 0.49 - 1.20 | 6830                   |
|        | Mann-Whitney | 3845***    | 0.663   | 0.54 - 0.80 | 15187                  |
| Fold 4 | Student      | 5.279***   | 0.905   | 0.55 - 1.25 | 26158                  |
|        | Mann-Whitney | 3995***    | 0.728   | 0.62 - 0.80 | 40171                  |
| Fold 5 | Student      | 5.872***   | 1.007   | 0.65 - 1.36 | 340190                 |
|        | Mann-Whitney | 4388***    | 0.898   | 0.85 - 0.93 | 6.78 × 10 <sup>6</sup> |
| Fold 6 | Student      | 4.927***   | 0.918   | 0.53 - 1.30 | 5475                   |
|        | Mann-Whitney | 3138***    | 0.846   | 0.77 - 0.96 | 41528                  |

**Supplementary Tab. 23 Results for comparison between external validation CV (leave-one-site-out CV and independent-samples (sites) CV) and others (i.e., k-fold, LOSO and hold-out CV) on model performance.** Results for Bayesian Mann-Whitney tests were based on augmentation algorithm with 5 chains of 1000 iteration. \*  $p < .05$ , \*\*  $p < .01$ , \*\*\*  $p < .001$

| Time             | Item 1     | Item 2      | Item 3      | Item 4      | Item 5      |
|------------------|------------|-------------|-------------|-------------|-------------|
| 2011             | 2.16129032 | 1.161290323 | 1.193548387 | 2.35483871  | 1.032258065 |
| 2012             | 2.58620689 | 2.24137931  | 1.275862069 | 2.448275862 | 1.206896552 |
| 2013             | 1.94736842 | 1.263157895 | 1.157894737 | 2.578947368 | 1           |
| 2014             | 2.21428571 | 1.571428571 | 1.285714286 | 2.571428571 | 1           |
| 2015             | 2.17241379 | 1.75862069  | 1.137931034 | 2.517241379 | 1.068965517 |
| 2016             | 2.62068965 | 1.931034483 | 1.275862069 | 2.413793103 | 1.137931034 |
| 2017             | 2.51063829 | 1.744680851 | 1.425531915 | 2.553191489 | 1           |
| 2018             | 2.88636363 | 2.454545455 | 1.818181818 | 2.727272727 | 1.363636364 |
| 2019             | 2.74285714 | 2.171428571 | 1.557142857 | 2.785714286 | 1.285714286 |
| 2020             | 2.94949494 | 2.444444444 | 1.525252525 | 2.616161616 | 1.262626263 |
| 2021             | 2.60784313 | 2.098039216 | 1.392156863 | 2.823529412 | 1.137254902 |
| $r$ (rho)        | 0.76**     | 0.60        | 0.72*       | 0.78**      | 0.48        |
| BF <sub>10</sub> | 5.01       | 2.70        | 3.53        | 7.03        | 1.28        |

**Supplementary Tab. 24 Results for correlation between time and quality scores.** Rho coefficient was estimated from Spearman correlation model. \*  $p < .05$ , \*\*  $p < .01$ , \*\*\*  $p < .001$ , BF<sub>10</sub> = Bayesian factor for supporting alternative hypothesis.

| <b>Category</b>                          | <b>Mean</b> | <b>S.D.</b> | <b>No. of studies</b> |
|------------------------------------------|-------------|-------------|-----------------------|
| Anxiety Disorder                         | 8.125       | 1.457737974 | 8                     |
| Bipolar Disorder                         | 8.935483871 | 1.749961597 | 31                    |
| Depression Disorder                      | 9           | 2.571556576 | 63                    |
| Conduct Disorder                         | 8.333333333 | 1.505545305 | 6                     |
| Feeding and Eating Disorder              | 8.5         | 1           | 4                     |
| Neurodevelopment Disorder                | 10.52261307 | 3.842642347 | 199                   |
| Obsessive Compulsive Disorder            | 8.9375      | 2.619637379 | 143                   |
| Personality Disorder                     | 9           | 1.414213562 | 2                     |
| Schizophrenia Disorder                   | 9.854700855 | 2.853506486 | 117                   |
| Sleep Disorder                           | 8           | 0           | 2                     |
| Somatic and Related Disorder             | 9 -         |             | 1                     |
| Substance-related and Addictive Disorder | 10.15       | 2.680828623 | 20                    |
| Post-Traumatic Stress Disorder           | 9.142857143 | 0.690065559 | 7                     |

**Supplementary Tab. 25 Study quality across psychiatric category.** S.D. = standard derivation
