# Supplementary material for: Sampling inequalities affect generalization of neuroimaging-based diagnostic classifiers in psychiatry
Source: Springer Nature journal article supplement (doi:10.1186/s12916-023-02941-4), 2023-07-03
Supplement: MOESM2 [file 25568348]

| ID   | DSM category             | First Author (s)        | Publication year | Journal                                      | Affiliation country | Sample country |
|------|--------------------------|-------------------------|------------------|----------------------------------------------|---------------------|----------------|
| [1]  | Intellectual Disability  | Inga Sophia Knoth       | 2018             | Journal of Neurodevelopmental Disorders      | Canada              | Montreal       |
| [2]  | Intellectual Disability  | Mangor Pedersen         | 2015             | Epilepsia                                    | Australia           | Victoria       |
| [3]  | Intellectual Disability  | Yalin Wang              | 2013             | Neuroimage                                   | USA                 | California     |
| [4]  | Intellectual Disability  | Fumiko Hoeft            | 2011             | JAMA Psychiatry                              | USA                 | California     |
| [5]  | Autism Spectrum Disorder | SarahParisot            | 2018             | Medical Image Analysis                       | UK                  | multiple       |
| [6]  | Autism Spectrum Disorder | Sean Matlis             | 2015             | BMC Neurology                                | USA                 | Massachusetts  |
| [7]  | Autism Spectrum Disorder | MadhuraIngalhalikar     | 2011             | Neuroimage                                   | USA                 | Pennsylvania   |
| [8]  | Autism Spectrum Disorder | HosseinShahamat         | 2020             | Neural Networks                              | Iran                | multiple       |
| [9]  | Autism Spectrum Disorder | Ghasem SadeghiBajestani | 2019             | Computer Methods and Programs in Biomedicine | Iran                | Mashhad        |
| [10] | Autism Spectrum Disorder | Pradyumna Lanka         | 2019             | Brain imaging and behavior                   | USA                 | multiple       |
| [11] | Autism Spectrum Disorder | LiangliangZhang         | 2020             | Computer Methods and Programs in Biomedicine | China               | Utah           |
| [12] | Autism Spectrum Disorder | Mladen Rakić            | 2020             | NeuroImage: Clinical                         | Spain               | multiple       |
| [13] | Autism Spectrum Disorder | Mehran Ahmadlou         | 2010             | Journal of Clinical Neurophysiology          | Iran                | Tehran         |
| [14] | Autism Spectrum Disorder | Lauren E. Libero        | 2015             | Cortex                                       | USA                 | Alabama        |

|      |                          |                      |      |                                                                   |           |              |
|------|--------------------------|----------------------|------|-------------------------------------------------------------------|-----------|--------------|
| [15] | Autism Spectrum Disorder | The-Hanh Pham        | 2020 | International journal of environmental research and public health | Singapore | Irbid        |
| [16] | Autism Spectrum Disorder | Olfa Graa            | 2019 | Journal of neuroscience methods                                   | Turkey    | Istanbul     |
| [17] | Autism Spectrum Disorder | Madhura Ingalhalikar | 2012 | Medical image computing and computer-assisted intervention        | USA       | Pennsylvania |
| [18] | Autism Spectrum Disorder | Meenakshi Khosla     | 2019 | NeuroImage                                                        | USA       | multiple     |
| [19] | Autism Spectrum Disorder | Hailong Li           | 2018 | Front Neurosci                                                    | USA       | multiple     |
| [20] | Autism Spectrum Disorder | Bhaskar Sen          | 2018 | Plos one                                                          | Canada    | multiple     |
| [21] | Autism Spectrum Disorder | Lingyu Xu            | 2020 | Clinical Neurophysiology                                          | China     | GuangDong    |
| [22] | Autism Spectrum Disorder | Xueke Ma             | 2021 | Neuroscience Letters                                              | China     | Utah         |
| [23] | Autism Spectrum Disorder | Zarina Rakhimberdina | 2020 | Sensors                                                           | Japan     | multiple     |
| [24] | Autism Spectrum Disorder | Vassilis Tsiaras     | 2011 | Computers in Biology and Medicine                                 | Greece    | Heraklion    |
| [25] | Autism Spectrum Disorder | Hui Wang             | 2012 | Plos one                                                          | USA       | California   |
| [26] | Autism Spectrum Disorder | Jinlong Hu           | 2020 | Computational and Mathematical Methods in Medicine                | China     | multiple     |
| [27] | Autism Spectrum Disorder | Minyoung Jung        | 2019 | Br J Psychiatry                                                   | Japan     | Utah         |

|      |                          |                        |      |                                                            |        |            |
|------|--------------------------|------------------------|------|------------------------------------------------------------|--------|------------|
| [28] | Autism Spectrum Disorder | Anibal Sólón Heinsfeld | 2017 | NeuroImage: Clinical                                       | Brazil | multiple   |
| [29] | Autism Spectrum Disorder | Runa Bhaumik           | 2018 | Neuroinformatics                                           | USA    | multiple   |
| [30] | Autism Spectrum Disorder | Liye Wang              | 2016 | Brain imaging and behavior                                 | China  | New York   |
| [31] | Autism Spectrum Disorder | ChristineEcker         | 2010 | NeuroImage                                                 | UK     | London     |
| [32] | Autism Spectrum Disorder | Seyedmehdi Payabvash   | 2019 | Brain connectivity                                         | USA    | California |
| [33] | Autism Spectrum Disorder | True Price             | 2014 | Medical image computing and computer-assisted intervention | USA    | New York   |
| [34] | Autism Spectrum Disorder | Reem Haweel            | 2020 | Medical physics                                            | USA    | Kentucky   |
| [35] | Autism Spectrum Disorder | Colleen P. Chen        | 2015 | NeuroImage: Clinical                                       | USA    | multiple   |
| [36] | Autism Spectrum Disorder | Jeffrey S. Anderson    | 2011 | Brain                                                      | USA    | Utah       |
| [37] | Autism Spectrum Disorder | Lucina Q. Uddin        | 2014 | JAMA Psychiatry                                            | USA    | California |
| [38] | Autism Spectrum Disorder | Jared A. Nielsen       | 2013 | Frontiers in Human Neuroscience                            | USA    | multiple   |
| [39] | Autism Spectrum Disorder | Afrooz Jahedi          | 2017 | Brain connectivity                                         | USA    | multiple   |
| [40] | Autism Spectrum Disorder | Alessandra Retico      | 2016 | Molecular Autism                                           | Italy  | Pisa       |

|      |                          |                     |      |                                              |           |            |
|------|--------------------------|---------------------|------|----------------------------------------------|-----------|------------|
| [41] | Autism Spectrum Disorder | Sara Calderoni      | 2012 | Neuroimage                                   | Italy     | Pisa       |
| [42] | Autism Spectrum Disorder | Bun Yamagata        | 2019 | Brain imaging and behavior                   | Japan     | Tokyo      |
| [43] | Autism Spectrum Disorder | Ilaria Gori         | 2015 | J Neuroimaging                               | Italy     | Pisa       |
| [44] | Autism Spectrum Disorder | Matthew Leming      | 2020 | International Journal of Neural Systems      | UK        | multiple   |
| [45] | Autism Spectrum Disorder | Mark D. Shen        | 2019 | Lancet Psychiatry                            | USA       | California |
| [46] | Autism Spectrum Disorder | EnzoGrossi          | 2017 | Computer Methods and Programs in Biomedicine | Italy     | Pisa       |
| [47] | Autism Spectrum Disorder | Sukrit Gupta        | 2020 | NeuroImage: Clinical                         | Singapore | New York   |
| [48] | Autism Spectrum Disorder | Sina Ghiassian      | 2016 | Plos one                                     | Canada    | New York   |
| [49] | Autism Spectrum Disorder | Chen Zu             | 2019 | Brain imaging and behavior                   | China     | New York   |
| [50] | Autism Spectrum Disorder | Gajendra J. Katuwal | 2016 | Plos one                                     | USA       | multiple   |
| [51] | Autism Spectrum Disorder | Qin Li              | 2019 | Cortex                                       | China     | multiple   |
| [52] | Autism Spectrum Disorder | Omar Dekhil         | 2018 | Plos one                                     | USA       | Kentucky   |
| [53] | Autism Spectrum Disorder | Bun Yamagata        | 2019 | Psychiatry and clinical neurosciences        | Japan     | Tokyo      |

|      |                          |                       |      |                                   |              |               |
|------|--------------------------|-----------------------|------|-----------------------------------|--------------|---------------|
| [54] | Autism Spectrum Disorder | Tetsuyalidaka         | 2015 | Cortex                            | Japan        | multiple      |
| [55] | Autism Spectrum Disorder | Wasifa Jamal          | 2014 | J Neural Eng                      | UK           | Southampton   |
| [56] | Autism Spectrum Disorder | Fan Zhang             | 2018 | Neuroimage                        | USA          | Massachusetts |
| [57] | Autism Spectrum Disorder | Sheeba J Sujit        | 2019 | J Magn Reson Imaging              | USA          | multiple      |
| [58] | Autism Spectrum Disorder | Huifang Huang         | 2019 | Human Brain Mapping               | China        | New York      |
| [59] | Autism Spectrum Disorder | Aina Eill             | 2019 | Brain connectivity                | USA          | California    |
| [60] | Autism Spectrum Disorder | Xiang Xiao            | 2016 | Autism Research                   | China        | JiangSu       |
| [61] | Autism Spectrum Disorder | Tae-Eui Kam           | 2017 | Human Brain Mapping               | Korea        | multiple      |
| [62] | Autism Spectrum Disorder | Sofia Ira Ktena       | 2018 | Neuroimage                        | UK           | multiple      |
| [63] | Autism Spectrum Disorder | Maryam Akhavan Aghdam | 2019 | Journal of digital imaging        | Iran         | multiple      |
| [64] | Autism Spectrum Disorder | Masoumeh Sadeghi      | 2017 | Psychiatry Research: Neuroimaging | Iran         | Utah          |
| [65] | Autism Spectrum Disorder | Ahmad Chaddad         | 2017 | BMC Neurosci                      | Canada       | Pennsylvania  |
| [66] | Autism Spectrum Disorder | Ridha Djemal          | 2017 | BioMed research international     | Saudi Arabia | Jeddah        |

|      |                          |                       |      |                                                           |              |                     |
|------|--------------------------|-----------------------|------|-----------------------------------------------------------|--------------|---------------------|
| [67] | Autism Spectrum Disorder | Noriaki Yahata        | 2016 | Nature communication                                      | Japan        | Tokyo/New York      |
| [68] | Autism Spectrum Disorder | T Heunis              | 2018 | BMC medicine                                              | South Africa | California          |
| [69] | Autism Spectrum Disorder | Heng Chen             | 2015 | Progress in Neuro-Psychopharmacology and Biology pathways | China        | New York/California |
| [70] | Autism Spectrum Disorder | Marcel Adam Just      | 2014 | Plos one                                                  | USA          | Kentucky            |
| [71] | Autism Spectrum Disorder | Maryam Akhavan Aghdam | 2018 | Journal of digital imaging                                | Iran         | multiple            |
| [72] | Autism Spectrum Disorder | Fahd A. Alturki       | 2020 | Sensors                                                   | Saudi Arabia | Jeddah              |
| [73] | Autism Spectrum Disorder | Alina Spiegel         | 2019 | Current Biology                                           | USA          | Maryland            |
| [74] | Autism Spectrum Disorder | Eugenia Conti         | 2020 | Journal of personalized medicine                          | Italy        | Pisa                |
| [75] | Autism Spectrum Disorder | Xia-an Bi             | 2018 | Frontiers in Human Neuroscience                           | China        | multiple            |
| [76] | Autism Spectrum Disorder | Luca Pollonini        | 2010 | Annu Int Conf IEEE Eng Med Biol Soc                       | USA          | Texas               |
| [77] | Autism Spectrum Disorder | Justin Eldridge       | 2014 | Journal of Neurodevelopmental Disorders                   | USA          | Ohio                |
| [78] | Autism Spectrum Disorder | Naseer Ahmed Khan     | 2020 | Brain sciences                                            | USA          | multiple            |
| [79] | Autism Spectrum Disorder | Zeinab Sherkatghanad  | 2020 | Front Neurosci                                            | Iran         | multiple            |

|      |                          |                 |      |                                                           |        |          |
|------|--------------------------|-----------------|------|-----------------------------------------------------------|--------|----------|
| [80] | Autism Spectrum Disorder | Jingjing Gao    | 2020 | Front Neurosci                                            | China  | multiple |
| [81] | Autism Spectrum Disorder | Yaya Liu        | 2020 | Experimental neurobiology                                 | China  | multiple |
| [82] | Autism Spectrum Disorder | Ming Yang       | 2021 | Frontiers in Human Neuroscience                           | China  | New York |
| [83] | Autism Spectrum Disorder | Zhi-An Huang    | 2020 | IEEE Transactions on Neural Networks and Learning Systems | China  | multiple |
| [84] | Autism Spectrum Disorder | Jie Zhao        | 2020 | Brain and behavior                                        | China  | Beijing  |
| [85] | Autism Spectrum Disorder | Fahad Almuqhim  | 2021 | Frontiers in computational neuroscience                   | USA    | multiple |
| [86] | Autism Spectrum Disorder | Lingyu Xu       | 2021 | Clinical Neurophysiology                                  | China  | Shanghai |
| [87] | Autism Spectrum Disorder | James Lu        | 2015 | Clinical psychological science                            | USA    | Texas    |
| [88] | Autism Spectrum Disorder | Md Rishad Ahmed | 2020 | IEEE J Biomed Health Inform                               | China  | multiple |
| [89] | Autism Spectrum Disorder | Lingyu Xu       | 2019 | Front Neurosci                                            | China  | Shanghai |
| [90] | Autism Spectrum Disorder | Chong - Yaw Wee | 2014 | Human Brain Mapping                                       | USA    | Kentucky |
| [91] | Autism Spectrum Disorder | Harshini Sewani | 2020 | Children (Basel)                                          | Canada | multiple |
| [92] | Autism Spectrum Disorder | Chunlei Shi     | 2021 | Brain sciences                                            | China  | multiple |

|       |                                          |                     |      |                                         |             |            |
|-------|------------------------------------------|---------------------|------|-----------------------------------------|-------------|------------|
| [93]  | Autism Spectrum Disorder                 | Amirali Kazeminejad | 2020 | Front Neurosci                          | Canada      | multiple   |
| [94]  | Autism Spectrum Disorder                 | WUTAO YIN           | 2019 | JOURNAL OF COMPUTATIONAL BIOLOGY        | Canada      | multiple   |
| [95]  | Autism Spectrum Disorder                 | Yun Jiao            | 2010 | Neuroimage                              | China       | JiangSu    |
| [96]  | Autism Spectrum Disorder                 | Donna L. Murdaugh   | 2012 | Plos one                                | USA         | Alabama    |
| [97]  | Autism Spectrum Disorder                 | Yuqing Song         | 2019 | Frontiers in Human Neuroscience         | China       | multiple   |
| [98]  | Autism Spectrum Disorder                 | Andrei Irimia       | 2018 | Frontiers in computational neuroscience | USA         | multiple   |
| [99]  | Autism Spectrum Disorder                 | Taban Eslami        | 2019 | Front Neuroinform.                      | USA         | multiple   |
| [100] | Autism Spectrum Disorder                 | Darko Sarovic       | 2020 | Int J Methods Psychiatr Res             | Sweden      | Gothenburg |
| [101] | Autism Spectrum Disorder                 | Amirali Kazeminejad | 2019 | Front Neurosci                          | Canada      | multiple   |
| [102] | Autism Spectrum Disorder                 | Xinyu Guo           | 2017 | Front Neurosci                          | USA         | Utah       |
| [103] | Autism Spectrum Disorder                 | Rajat Mani Thomas   | 2020 | Front Psychiatry                        | Netherlands | multiple   |
| [104] | Attention-Deficit/Hyperactivity Disorder | He Chen             | 2019 | Neuroscience                            | China       | Beijing    |
| [105] | Attention-Deficit/Hyperactivity Disorder | Xiaojie Guo         | 2020 | Transl Psychiatry                       | China       | Beijing    |



|       |                                          |                          |      |                                     |             |                   |
|-------|------------------------------------------|--------------------------|------|-------------------------------------|-------------|-------------------|
| [106] | Attention-Deficit/Hyperactivity Disorder | Andreas Müller           | 2020 | World J Biol Psychiatry             | Switzerland | Chur              |
| [107] | Attention-Deficit/Hyperactivity Disorder | Ming-Shan Gao            | 2020 | Annu Int Conf IEEE Eng Med Biol Soc | Taiwan      | multiple          |
| [108] | Attention-Deficit/Hyperactivity Disorder | Ying Chen                | 2020 | Artificial Intelligence in Medicine | China       | multiple          |
| [109] | Attention-Deficit/Hyperactivity Disorder | Muthuraman<br>Muthuraman | 2019 | Scientific Report                   | Germany     | Frankfurt am Main |
| [110] | Attention-Deficit/Hyperactivity Disorder | Chris McNorgan           | 2020 | Front Physiol.                      | USA         | multiple          |
| [111] | Attention-Deficit/Hyperactivity Disorder | Amirali Vahid            | 2019 | J Clin Med                          | Germany     | Dresden           |
| [112] | Attention-Deficit/Hyperactivity Disorder | Atif Riaz                | 2020 | Journal of neuroscience methods     | UK          | multiple          |
| [113] | Attention-Deficit/Hyperactivity Disorder | Mohammad<br>Rostami      | 2020 | Basic Clin Neurosci.                | Iran        | Tehran            |
| [114] | Attention-Deficit/Hyperactivity Disorder | Hanni Kiiskia            | 2020 | Clinical Neurophysiology            | Ireland     | Dublin            |
| [115] | Attention-Deficit/Hyperactivity Disorder | Minyoung Jung            | 2020 | Br J Psychiatry                     | Japan       | multiple          |
| [116] | Attention-Deficit/Hyperactivity Disorder | Yibin Tang               | 2019 | Journal of Attention Disorders      | China       | multiple          |
| [117] | Attention-Deficit/Hyperactivity Disorder | Yunkai Sun               | 2020 | Neuropsychiatr Dis Treat.           | China       | New York          |
| [118] | Attention-Deficit/Hyperactivity Disorder | Gagan Sidhu              | 2019 | IEEE J Transl Eng Health Med        | Canada      | multiple          |

|       |                                          |                               |      |                                           |        |                                                                                 |
|-------|------------------------------------------|-------------------------------|------|-------------------------------------------|--------|---------------------------------------------------------------------------------|
| [119] | Attention-Deficit/Hyperactivity Disorder | Atif Riaz                     | 2018 | Computerized Medical Imaging and Graphics | UK     | multiple                                                                        |
| [120] | Attention-Deficit/Hyperactivity Disorder | Simranjit Kaur                | 2019 | Clinical EEG and Neuroscience             | India  | Chandigarh                                                                      |
| [121] | Attention-Deficit/Hyperactivity Disorder | Ming Chen                     | 2019 | Radiol Artif Intell                       | USA    | multiple                                                                        |
| [122] | Attention-Deficit/Hyperactivity Disorder | Stephanie Sutoko              | 2019 | Neurophotonics                            | Japan  | Tochigi                                                                         |
| [123] | Attention-Deficit/Hyperactivity Disorder | Yuyang Luo                    | 2020 | NeuroImage: Clinical                      | USA    | New Jersey                                                                      |
| [124] | Attention-Deficit/Hyperactivity Disorder | Xun-Heng Wang                 | 2018 | Neuroscience Letters                      | China  | New York                                                                        |
| [125] | Attention-Deficit/Hyperactivity Disorder | Xiaolong Peng                 | 2013 | Plos one                                  | China  | Beijing                                                                         |
| [126] | Attention-Deficit/Hyperactivity Disorder | Akira Yasumura                | 2020 | Journal of Attention Disorders            | Japan  | Kodaira/Bunkyo/Setagaya/Fukushima/Saitama/Koganei/Fukuoka/Shinjuku/Tottori/Kofu |
| [127] | Attention-Deficit/Hyperactivity Disorder | Muhammad Naveed Iqbal Qureshi | 2017 | Frontiers in Human Neuroscience           | Korea  | multiple                                                                        |
| [128] | Attention-Deficit/Hyperactivity Disorder | J Biederman                   | 2017 | Psychological Medicine                    | USA    | Massachusetts                                                                   |
| [129] | Attention-Deficit/Hyperactivity Disorder | Jean-G. Gehricke              | 2017 | Plos one                                  | USA    | California                                                                      |
| [130] | Attention-Deficit/Hyperactivity Disorder | João Ricardo Sato             | 2012 | Front Syst Neurosci                       | Brazil | multiple                                                                        |

|       |                                                                |                   |      |                                                                          |             |          |
|-------|----------------------------------------------------------------|-------------------|------|--------------------------------------------------------------------------|-------------|----------|
| [131] | ivity Disorder<br>Attention-Deficit/Hyperact<br>ivity Disorder | Reto Iannaccone   | 2015 | Eur Child Adolesc Psychiatry                                             | Switzerland | Mannheim |
| [132] | Attention-Deficit/Hyperact<br>ivity Disorder                   | Yue Gu            | 2018 | J Neural Eng                                                             | China       | Beijing  |
| [133] | Attention-Deficit/Hyperact<br>ivity Disorder                   | Junqiang Du       | 2016 | Computerized Medical Imaging and<br>Graphics                             | China       | Beijing  |
| [134] | Attention-Deficit/Hyperact<br>ivity Disorder                   | Xun-Heng Wang     | 2018 | Scientific Report                                                        | China       | multiple |
| [135] | Attention-Deficit/Hyperact<br>ivity Disorder                   | Heledd Hart       | 2014 | Human Brain Mapping                                                      | UK          | London   |
| [136] | Attention-Deficit/Hyperact<br>ivity Disorder                   | Dai Dai           | 2012 | Front Syst Neurosci                                                      | China       | multiple |
| [137] | Attention-Deficit/Hyperact<br>ivity Disorder                   | Shuaiqi Liu       | 2021 | IEEE TRANSACTIONS ON NEURAL<br>SYSTEMS AND REHABILITATION<br>ENGINEERING | China       | multiple |
| [138] | Attention-Deficit/Hyperact<br>ivity Disorder                   | Xunheng Wang      | 2013 | Eur J Radiol                                                             | China       | New York |
| [139] | Attention-Deficit/Hyperact<br>ivity Disorder                   | Gagan S. Sidhu    | 2012 | Front Syst Neurosci                                                      | Canada      | multiple |
| [140] | Attention-Deficit/Hyperact<br>ivity Disorder                   | Martina D Liechti | 2013 | Brain Topogr                                                             | Switzerland | Zurich   |
| [141] | Attention-Deficit/Hyperact<br>ivity Disorder                   | C Z Zhu           | 2005 | NeuroImage                                                               | China       | Beijing  |
| [142] | Attention-Deficit/Hyperact<br>ivity Disorder                   | Emanuele Olivetti | 2012 | Front Syst Neurosci                                                      | Italy       | multiple |

|       |                                          |                              |      |                                                                                                          |             |          |
|-------|------------------------------------------|------------------------------|------|----------------------------------------------------------------------------------------------------------|-------------|----------|
| [143] | Attention-Deficit/Hyperactivity Disorder | Blair A. Johnston            | 2014 | Human Brain Mapping                                                                                      | UK          | Juelich  |
| [144] | Attention-Deficit/Hyperactivity Disorder | Abhay M S Aradhya            | 2018 | 2018 40th Annual International Conference of the IEEE Engineering in Medicine and Biology Society (EMBC) | Singapore   | multiple |
| [145] | Attention-Deficit/Hyperactivity Disorder | Che-Wei Chang                | 2012 | Front Syst Neurosci                                                                                      | Taiwan      | multiple |
| [146] | Attention-Deficit/Hyperactivity Disorder | Janette L Smith              | 2003 | Journal of Child Psychology and Psychiatry                                                               | Australia   | Sydney   |
| [147] | Attention-Deficit/Hyperactivity Disorder | Anderson dos Santos Siqueira | 2014 | BioMed research international                                                                            | Brazil      | multiple |
| [148] | Attention-Deficit/Hyperactivity Disorder | Huaiqiang Sun*               | 2017 | Radiology                                                                                                | China       | Sichuan  |
| [149] | Attention-Deficit/Hyperactivity Disorder | Andreas Mueller              | 2010 | Nonlinear biomedical physics                                                                             | Switzerland | Chur     |
| [150] | Attention-Deficit/Hyperactivity Disorder | Wei Cheng                    | 2012 | Front Syst Neurosci                                                                                      | China       | multiple |
| [151] | Attention-Deficit/Hyperactivity Disorder | Mehran Ahmadlou              | 2010 | Clinical EEG and Neuroscience                                                                            | Iran        | Tehran   |
| [152] | Attention-Deficit/Hyperactivity Disorder | Berdakh Abibullaev           | 2011 | Journal of Medical Systems                                                                               | Korea       | Daegu    |
| [153] | Attention-Deficit/Hyperactivity Disorder | John B. Colby                | 2012 | Front Syst Neurosci                                                                                      | USA         | multiple |
| [154] | Attention-Deficit/Hyperactivity Disorder | Andreas Mueller              | 2011 | Nonlinear biomedical physics                                                                             | Switzerland | Chur     |
| [155] | Attention-Deficit/Hyperactivity Disorder | Dongchuan Yu                 | 2013 | Plos one                                                                                                 | China       | Beijing  |

|       |                                          |                               |      |                                                                  |             |          |
|-------|------------------------------------------|-------------------------------|------|------------------------------------------------------------------|-------------|----------|
| [156] | Attention-Deficit/Hyperactivity Disorder | S-S Poil                      | 2013 | Clinical Neurophysiology                                         | Switzerland | Zürich   |
| [157] | Attention-Deficit/Hyperactivity Disorder | Muhammad Naveed Iqbal Quresh  | 2016 | Plos one                                                         | Korea       | multiple |
| [158] | Attention-Deficit/Hyperactivity Disorder | Sina Ghiassian                | 2016 | Plos one                                                         | Canada      | multiple |
| [159] | Attention-Deficit/Hyperactivity Disorder | Heledd Hart                   | 2014 | Journal of the American Academy of Child & Adolescent Psychiatry | UK          | London   |
| [160] | Attention-Deficit/Hyperactivity Disorder | Muhammad Naveed Iqbal Qureshi | 2016 | Annu Int Conf IEEE Eng Med Biol Soc                              | Korea       | Beijing  |
| [161] | Attention-Deficit/Hyperactivity Disorder | Gopikrishna Deshpande         | 2015 | IEEE TRANSACTIONS ON CYBERNETICS                                 | USA         | multiple |
| [162] | Attention-Deficit/Hyperactivity Disorder | Rubi Hammer                   | 2015 | NeuroImage: Clinical                                             | USA         | Illinois |
| [163] | Attention-Deficit/Hyperactivity Disorder | MajidMoghaddari               | 2020 | Computer Methods and Programs in Biomedicine                     | Iran        | Tabriz   |
| [164] | Attention-Deficit/Hyperactivity Disorder | Ernesto Pereda                | 2018 | Plos one                                                         | Spain       | Tenerife |
| [165] | Attention-Deficit/Hyperactivity Disorder | Lena Lim                      | 2013 | Plos one                                                         | UK          | London   |
| [166] | Attention-Deficit/Hyperactivity Disorder | HüseyinÖztoprak               | 2017 | Clinical Neurophysiology                                         | Cyprus      | Ankara   |
| [167] | Attention-Deficit/Hyperactivity Disorder | Hui TianTora                  | 2021 | Computer Methods and Programs in Biomedicine                     | Singapore   | Clementi |
| [168] | Attention-Deficit/Hyperactivity Disorder | Mustafa Tosun                 | 2021 | Physical and Engineering Sciences in                             | Turkey      | Kutahya  |

|       | ivity Disorder                           |                                                   |      | Medicine                                      |                       |                |
|-------|------------------------------------------|---------------------------------------------------|------|-----------------------------------------------|-----------------------|----------------|
| [169] | Attention-Deficit/Hyperactivity Disorder | Author links open overlay panelStuart J.Johnstone | 2021 | Biological Psychology                         | Australia             | Beijing        |
| [170] | Attention-Deficit/Hyperactivity Disorder | Soumyabrata Dey                                   | 2012 | Front Syst Neurosci                           | USA                   | multiple       |
| [171] | Attention-Deficit/Hyperactivity Disorder | Jae Hyun Yoo                                      | 2020 | Brain imaging and behavior                    | Korea                 | Seoul          |
| [172] | Attention-Deficit/Hyperactivity Disorder | Aleksandar Tenev                                  | 2014 | International Journal of Psychophysiology     | Republic of Macedonia | Skopje         |
| [173] | Attention-Deficit/Hyperactivity Disorder | Bhaskar Sen                                       | 2018 | Plos one                                      | Canada                | multiple       |
| [174] | Attention-Deficit/Hyperactivity Disorder | Maryam Rezaeezadeh                                | 2020 | Physical and Engineering Sciences in Medicine | Iran                  | Tehran         |
| [175] | Attention-Deficit/Hyperactivity Disorder | Alessandro Crippa                                 | 2017 | Front Psychiatry                              | Italy                 | Lecco          |
| [176] | Attention-Deficit/Hyperactivity Disorder | Ayaka Ishii-Takahashi                             | 2013 | NeuroImage: Clinical                          | Japan                 | Tokyo          |
| [177] | Attention-Deficit/Hyperactivity Disorder | Tao Zhang                                         | 2020 | Entropy                                       | China                 | multiple       |
| [178] | Attention-Deficit/Hyperactivity Disorder | Dimitri M Abramov                                 | 2019 | PeerJ                                         | Brazil                | Rio de Janeiro |
| [179] | Attention-Deficit/Hyperactivity Disorder | Soumyabrata Dey                                   | 2014 | Frontiers in neural circuits                  | USA                   | multiple       |
| [180] | Attention-Deficit/Hyperactivity Disorder | Halla Helgadóttir                                 | 2015 | BMJ open                                      | Iceland               | Reykjavik      |

|       |                                          |                              |      |                                              |             |                       |
|-------|------------------------------------------|------------------------------|------|----------------------------------------------|-------------|-----------------------|
| [181] | Attention-Deficit/Hyperactivity Disorder | Julie Chi Chow               | 2019 | Clinical EEG and Neuroscience                | Taiwan      | Kaohsiung             |
| [182] | Attention-Deficit/Hyperactivity Disorder | He Chen                      | 2019 | J Neural Eng                                 | China       | Beijing               |
| [183] | Attention-Deficit/Hyperactivity Disorder | Hossein R. Jahanshahloo      | 2017 | Journal of Medical Signals and Sensors       | Iran        | Once Caldas Deportiva |
| [184] | Attention-Deficit/Hyperactivity Disorder | Thomas Wolfers               | 2016 | NeuroImage: Clinical                         | Netherlands | Amsterdam/Vrije       |
| [185] | Attention-Deficit/Hyperactivity Disorder | Lizhen Shao                  | 2020 | Computer Methods and Programs in Biomedicine | China       | Beijing               |
| [186] | Attention-Deficit/Hyperactivity Disorder | Sarah Itani                  | 2019 | Plos one                                     | Belgium     | multiple              |
| [187] | Attention-Deficit/Hyperactivity Disorder | Shiva Khoshnoud              | 2018 | Journal of Integrative Neuroscience          | Iran        | Tehran                |
| [188] | Attention-Deficit/Hyperactivity Disorder | Rupesh Kumar Chikara         | 2019 | Sensors                                      | Taiwan      | Taipei                |
| [189] | Specific Learning Disorder               | Philipp Johannes Dinkel,     | 2013 | Plos one                                     | Germany     | Aachen                |
| [190] | Specific Learning Disorder               | Sofia Zahia                  | 2020 | Computer Methods and Programs in Biomedicine | Spain       | Bilbao                |
| [191] | Specific Learning Disorder               | Piotr Płoński                | 2017 | Human Brain Mapping                          | Poland      | Aachen                |
| [192] | Specific Learning Disorder               | Francisco J. Martinez-Murcia | 2020 | International Journal of Neural Systems      | Spain       | Malaga                |
| [193] | Specific Learning Disorder               | A Z A Zainuddin              | 2019 | Annu Int Conf IEEE Eng Med Biol Soc          | Malaysia    | Selangor              |

|       |                            |                         |      |                                             |           |                              |
|-------|----------------------------|-------------------------|------|---------------------------------------------|-----------|------------------------------|
| [194] | Specific Learning Disorder | Bettina Serrallach      | 2016 | Front Neurosci                              | Germany   | Heidelberg                   |
| [195] | Specific Learning Disorder | Zaixu Cui               | 2016 | Human Brain Mapping                         | China     | Beijing                      |
| [196] | Specific Learning Disorder | Yolanda García Chimenoa | 2014 | Bio-Medical Materials and Engineering       | Spain     | Bilbao                       |
| [197] | Specific Learning Disorder | Stephen Bailey          | 2017 | Ann Dyslexia                                | USA       | Tennessee                    |
| [198] | Specific Learning Disorder | Opeyemi Lateef Usman,   | 2021 | Plos one                                    | Malaysia  | Beijing                      |
| [199] | Specific Learning Disorder | Sara Mascheretti        | 2021 | Brain sciences                              | Italy     | Parini                       |
| [200] | Schizophrenia              | Ang Li                  | 2020 | Nat Med                                     | China     | Beijing/Xian/ZhengZhou/Wuhan |
| [201] | Schizophrenia              | Young Tak Jo            | 2020 | Int J Methods Psychiatr Res                 | Korea     | Seoul                        |
| [202] | Schizophrenia              | Walid Yassin            | 2020 | Transl Psychiatry                           | Japan     | Tokyo                        |
| [203] | Schizophrenia              | ZhiHong Chen            | 2020 | Computational Intelligence and Neuroscience | China     | multiple                     |
| [204] | Schizophrenia              | V. Jahmunal             | 2019 | Artificial Intelligence in Medicine         | Singapore | Warsaw                       |
| [205] | Schizophrenia              | Lubin Wang              | 2020 | International Journal of Neural Systems     | China     | Beijing                      |
| [206] | Schizophrenia              | Pavol Mikolas           | 2018 | BMC Psychiatry                              | Germany   | Prague                       |
| [207] | Schizophrenia              | Emanuel Schwarz         | 2019 | Transl Psychiatry                           | Germany   | Aachen/Stockholm/Oslo/Verona |
| [208] | Schizophrenia              | Mate Baradits           | 2020 | Psychiatry Research                         | Hungary   | Budapest                     |
| [209] | Schizophrenia              | Jieun Kim               | 2020 | Journal of neuroscience methods             | Korea     | Daejeon                      |
| [210] | Schizophrenia              | Adriana Miyazaki de     | 2018 | Psychiatry Research: Neuroimaging           | Brazil    | São Paulo                    |



Moura

|       |               |                   |      |                                                              |           |                                    |
|-------|---------------|-------------------|------|--------------------------------------------------------------|-----------|------------------------------------|
| [211] | Schizophrenia | Maeri Yamamoto    | 2020 | Plos one                                                     | Japan     | Toyama/Nagoya                      |
| [212] | Schizophrenia | Hongliang Zou     | 2019 | Artificial Intelligence in Medicine                          | China     | unknown                            |
| [213] | Schizophrenia | Martin Rozycki    | 2018 | Schizophrenia Bulletin                                       | USA       | Philadelphia/TianJing/Xian/Beijing |
| [214] | Schizophrenia | Sugai Liang       | 2020 | Schizophrenia research                                       | China     | Sichuan                            |
| [215] | Schizophrenia | Golnoush Alamian  | 2020 | NeuroImage: Clinical                                         | Canada    | Cardiff                            |
| [216] | Schizophrenia | A. de Pierrefeu   | 2018 | Acta Psychiatrica Scandinavia                                | France    | unknown                            |
| [217] | Schizophrenia | Pasquale Di Carlo | 2020 | Psychological Medicine                                       | Italy     | Bari                               |
| [218] | Schizophrenia | Youngoh Bae       | 2018 | Journal of digital imaging                                   | Korea     | Washington                         |
| [219] | Schizophrenia | Yang Yu           | 2013 | Plos one                                                     | China     | Hunan                              |
| [220] | Schizophrenia | Petr Dluhos       | 2017 | Neuroimage                                                   | Czech     | Brno/Utrecht/Bohni<br>ce           |
| [221] | Schizophrenia | Jungsun Lee       | 2018 | NeuroImage: Clinical                                         | USA       | Seoul                              |
| [222] | Schizophrenia | Linda A Antonucci | 2019 | Neuropsychopharmacology                                      | Germany   | Bari                               |
| [223] | Schizophrenia | Xiaobing Lu       | 2016 | Medicine (Baltimore)                                         | China     | GuangDong                          |
| [224] | Schizophrenia | Darya Chyzyk      | 2015 | International Journal of Neural Systems                      | Spain     | San Sebastian                      |
| [225] | Schizophrenia | Rixing Jing       | 2019 | Human Brain Mapping                                          | China     | Beijing                            |
| [226] | Schizophrenia | Minghui Hua       | 2020 | Progress in Neuro-Psychopharmacology<br>and Biology pathways | China     | Tianjing                           |
| [227] | Schizophrenia | Ian C Gould       | 2014 | NeuroImage: Clinical                                         | Australia | multiple                           |
| [228] | Schizophrenia | Hong Song         | 2017 | BMC Med inform decision making                               | China     | Beijing                            |
| [229] | Schizophrenia | Qi Zhu            | 2018 | Biomed Engineering Online                                    | China     | Nanjing                            |
| [230] | Schizophrenia | Wei Zhao          | 2020 | Schizophrenia Bulletin                                       | China     | Taibei                             |
| [231] | Schizophrenia | Rowena Chin       | 2018 | Scientific Report                                            | Singapore | Buangkok View                      |
| [232] | Schizophrenia | S J Iwabuchi      | 2017 | Psychological Medicine                                       | UK        | multiple                           |

|       |               |                      |      |                                     |             |                                           |
|-------|---------------|----------------------|------|-------------------------------------|-------------|-------------------------------------------|
| [233] | Schizophrenia | Julie L Winterburn   | 2019 | Schizophrenia research              | UK          | multiple                                  |
| [234] | Schizophrenia | Heng Chen            | 2017 | Autism Research                     | China       | Henan                                     |
| [235] | Schizophrenia | Petra Verena Viher   | 2017 | NeuroImage: Clinical                | Switzerland | Sichuan                                   |
| [236] | Schizophrenia | Ling-Li Zeng         | 2018 | EBioMedicine                        | China       | Xian/Anhui/Changsha/California/Washington |
| [237] | Schizophrenia | Kaustubh Supekar     | 2019 | Biol Psychiatry                     | USA         | New Mexico/Wisconsin                      |
| [238] | Schizophrenia | Dana Mastrovito      | 2018 | NeuroImage: Clinical                | USA         | multiple                                  |
| [239] | Schizophrenia | Yi Liu               | 2018 | Schizophrenia research              | China       | Hunan/Henan                               |
| [240] | Schizophrenia | Long-Biao Cui        | 2018 | Schizophrenia Bulletin              | China       | Shanxi                                    |
| [241] | Schizophrenia | Walter H L Pinaya    | 2019 | Human Brain Mapping                 | Brazil      | unknown                                   |
| [242] | Schizophrenia | Xi Chen              | 2017 | Journal of affective disorders      | China       | Sichuan                                   |
| [243] | Schizophrenia | Hugo G Schnack       | 2014 | Neuroimage                          | Netherlands | Utrecht                                   |
| [244] | Schizophrenia | Hu Cheng             | 2015 | Schizophrenia research              | USA         | Indiana                                   |
| [245] | Schizophrenia | P Mikolas            | 2016 | Psychological Medicine              | Czech       | Prague                                    |
| [246] | Schizophrenia | Archana Venkataraman | 2012 | Schizophrenia research              | USA         | Massachusetts                             |
| [247] | Schizophrenia | Shuai Wang           | 2018 | Schizophrenia research              | China       | Henan                                     |
| [248] | Schizophrenia | Carlos Cabral        | 2016 | Schizophrenia Bulletin              | Germany     | multiple                                  |
| [249] | Schizophrenia | Bjorn H Edrup        | 2019 | Psychological Medicine              | Denmark     | Copenhagen                                |
| [250] | Schizophrenia | Walter H L Pinaya    | 2016 | Scientific Report                   | Brazil      | São Paulo                                 |
| [251] | Schizophrenia | Junghoe Kim          | 2016 | Neuroimage                          | Korea       | multiple                                  |
| [252] | Schizophrenia | Joseph de Viviano    | 2018 | Biol Psychiatry                     | Canada      | multiple                                  |
| [253] | Schizophrenia | Eduardo Castro       | 2014 | Annu Int Conf IEEE Eng Med Biol Soc | Chilie      | unknown                                   |
| [254] | Schizophrenia | Weiheng Yan          | 2019 | EBioMedicine                        | China       | Beijing/Xian/Xingxia                      |

|       |               |                       |      |                                                               |          |                                   |
|-------|---------------|-----------------------|------|---------------------------------------------------------------|----------|-----------------------------------|
|       |               |                       |      |                                                               |          | ng/Wuhan/Zhumadi<br>an            |
| [255] | Schizophrenia | Pierre Orban          | 2018 | Schizophrenia research                                        | Canada   | unknown                           |
| [256] | Schizophrenia | Yang Yu               | 2013 | Biomed Engineering Online                                     | China    | Hunan                             |
| [257] | Schizophrenia | Keith Dillon          | 2017 | Journal of neuroscience methods                               | USA      | multiple                          |
| [258] | Schizophrenia | Giulio Pergola        | 2017 | Schizophrenia research                                        | Italy    | Bari                              |
| [259] | Schizophrenia | Hui Shen              | 2010 | Neuroimage                                                    | China    | Hunan                             |
| [260] | Schizophrenia | Wen-Lin Chu           | 2016 | Behav Neurol                                                  | Taiwan   | Chiayi                            |
| [261] | Schizophrenia | Kirill Masychev       | 2021 | IEEE Trans Biomed Eng                                         | USA      | Ontario                           |
| [262] | Schizophrenia | A I Korda             | 2021 | Psychiatry Research: Neuroimaging                             | Germany  | Munich                            |
| [263] | Schizophrenia | Laura<br>Pina-Camacho | 2015 | Eur Child Adolesc Psychiatry                                  | Spain    | multiple                          |
| [264] | Schizophrenia | Eduardo Castro        | 2011 | Neuroimage                                                    | USA      | Connecticut                       |
| [265] | Schizophrenia | Stefan P Koch         | 2015 | Plos one                                                      | Germany  | Berlin                            |
| [266] | Schizophrenia | Eduardo Castro        | 2014 | Annu Int Conf IEEE Eng Med Biol Soc                           | Chilie   | Massachusetts/low<br>a/New Mexico |
| [267] | Schizophrenia | Juan I Arribas        | 2010 | IEEE Trans Biomed Eng                                         | Spain    | San Sebastian                     |
| [268] | Schizophrenia | Jong H Yoon           | 2012 | Schizophrenia research                                        | USA      | California                        |
| [269] | Schizophrenia | Darya Chyzyk          | 2015 | Neural Networks                                               | Spain    | multiple                          |
| [270] | Schizophrenia | Peng Wang             | 2008 | Medical image computing and<br>computer-assisted intervention | USA      | unknown                           |
| [271] | Schizophrenia | Nuri F Ince           | 2008 | Annu Int Conf IEEE Eng Med Biol Soc                           | USA      | Minnesota                         |
| [272] | Schizophrenia | J R Sveinsson         | 1997 | Med Eng Phys                                                  | Iceland  | unknown                           |
| [273] | Schizophrenia | David Calhas          | 2020 | Artificial Intelligence in Medicine                           | Portugal | Texas                             |
| [274] | Schizophrenia | Vince D Calhoun       | 2008 | Human Brain Mapping                                           | USA      | Connecticut                       |
| [275] | Schizophrenia | Andres H Neuhaus      | 2012 | European Archives of Psychiatry and                           | Germany  | New York                          |

|       |               |                                  |      |                                                                                                   |           |             |
|-------|---------------|----------------------------------|------|---------------------------------------------------------------------------------------------------|-----------|-------------|
| [276] | Schizophrenia | Tingting Xu                      | 2016 | Clinical Neuroscience<br>IEEE TRANSACTIONS ON NEURAL<br>SYSTEMS AND REHABILITATION<br>ENGINEERING | USA       | Minnesota   |
| [277] | Schizophrenia | Maryam Ravan                     | 2012 | Annu Int Conf IEEE Eng Med Biol Soc                                                               | Canada    | McMaster    |
| [278] | Schizophrenia | U Castellani                     | 2012 | J Neural Transm (Vienna)                                                                          | Italy     | Verona      |
| [279] | Schizophrenia | Smith K Khare                    | 2020 | BOOK                                                                                              | India     | California  |
| [280] | Schizophrenia | Weizheng Yan                     | 2021 | Schizophrenia research                                                                            | USA       | multiple    |
| [281] | Schizophrenia | Yuhui Du                         | 2020 | NeuroImage: Clinical                                                                              | China     | multiple    |
| [282] | Schizophrenia | Kanghan Oh                       | 2019 | Schizophrenia research                                                                            | Korea     | Jeonju-si   |
| [283] | Schizophrenia | Yingying Guo                     | 2020 | Brain sciences                                                                                    | China     | multiple    |
| [284] | Schizophrenia | Muhammad Naveed<br>Iqbal Qureshi | 2017 | Front Neuroinform.                                                                                | Korea     | multiple    |
| [285] | Schizophrenia | Ioannis K Gallos                 | 2021 | AIMS Neurosci                                                                                     | Greece    | multiple    |
| [286] | Schizophrenia | Tian Wang                        | 2020 | IEEE TRANSACTIONS ON CYBERNETICS                                                                  | Singapore | multiple    |
| [287] | Schizophrenia | Jinyu Zang                       | 2021 | Front Neurosci                                                                                    | China     | GuangDong   |
| [288] | Schizophrenia | Mengjiao Hu                      | 2021 | Schizophrenia research                                                                            | Singapore | multiple    |
| [289] | Schizophrenia | Kyungwon Kim                     | 2021 | Plos one                                                                                          | Korea     | multiple    |
| [290] | Schizophrenia | Raymond Salvador                 | 2019 | Front Neurosci                                                                                    | Spain     | Barcelona   |
| [291] | Schizophrenia | Po-Han Chou                      | 2021 | Front Psychiatry                                                                                  | Taiwan    | Hsinchu     |
| [292] | Schizophrenia | Zhuangzhuang Li                  | 2021 | Computerized Medical Imaging and<br>Graphics                                                      | China     | JiangSu     |
| [293] | Schizophrenia | Honghui Yang                     | 2010 | Frontiers in Human Neuroscience                                                                   | China     | Connecticut |
| [294] | Schizophrenia | Sunil Vasu Kalmady               | 2019 | NPJ Schizophr                                                                                     | Canada    | Bangalore   |
| [295] | Schizophrenia | Wenming Liu                      | 2020 | Front Neurosci                                                                                    | China     | Shanxi      |
| [296] | Schizophrenia | Ravi Bansal                      | 2012 | Plos one                                                                                          | USA       | New York    |

|       |               |                     |      |                                                                                           |           |             |
|-------|---------------|---------------------|------|-------------------------------------------------------------------------------------------|-----------|-------------|
| [297] | Schizophrenia | Fali Li             | 2019 | IEEE TRANSACTIONS ON NEURAL SYSTEMS AND REHABILITATION ENGINEERING                        | China     | Beijing     |
| [298] | Schizophrenia | Zongya Zhao         | 2021 | Front Neurosci                                                                            | China     | Maryland    |
| [299] | Schizophrenia | Su Mi Park          | 2021 | Front Psychiatry                                                                          | Korea     | Seoul       |
| [300] | Schizophrenia | Du Lei              | 2020 | Human Brain Mapping                                                                       | China     | multiple    |
| [301] | Schizophrenia | Jeong-Youn Kim      | 2020 | J Clin Med                                                                                | Korea     | Seoul       |
| [302] | Schizophrenia | Dafa Shi            | 2021 | Disease Markers                                                                           | China     | multiple    |
| [303] | Schizophrenia | Ahmad Shalhaf       | 2020 | Physical and Engineering Sciences in Medicine                                             | Iran      | Warsaw      |
| [304] | Schizophrenia | Eva Janousova       | 2016 | Front Neurosci                                                                            | Czech     | Brno        |
| [305] | Schizophrenia | Johannes Lieslehto  | 2021 | NPJ Schizophr                                                                             | Finland   | multiple    |
| [306] | Schizophrenia | Peng-Fei Ke         | 2021 | Scientific Report                                                                         | China     | GuangDong   |
| [307] | Schizophrenia | Mina Gheiratmand    | 2017 | NPJ Schizophr                                                                             | Canada    | multiple    |
| [308] | Schizophrenia | Jiayu Chen          | 2021 | Human Brain Mapping                                                                       | USA       | multiple    |
| [309] | Schizophrenia | Jihoon Oh           | 2020 | Front Psychiatry                                                                          | Korea     | multiple    |
| [310] | Schizophrenia | Kuldeep Singh       | 2021 | Proc Inst Mech Eng H                                                                      | India     | Warsaw      |
| [311] | Schizophrenia | Jie Sun             | 2021 | Scientific Report                                                                         | China     | Beijing     |
| [312] | Schizophrenia | Ying-Jie Li         | 2005 | Conf Proc IEEE Eng Med Biol Soc                                                           | China     | Shanghai    |
| [313] | Schizophrenia | Jason K. Johannesen | 2016 | Neuropsychiatr Electrophysiol                                                             | USA       | Connecticut |
| [314] | Schizophrenia | Kangyu Jin          | 2021 | Acta Neuropsychiatr<br>IEEE TRANSACTIONS ON NEURAL SYSTEMS AND REHABILITATION ENGINEERING | China     | Zhejiang    |
| [315] | Schizophrenia | Siuly Siuly         | 2020 | IEEE TRANSACTIONS ON NEURAL SYSTEMS AND REHABILITATION ENGINEERING                        | Australia | multiple    |
| [316] | Schizophrenia | A I Korda           | 2021 | Psychiatry Research: Neuroimaging                                                         | Germany   | Munich      |

|       |                  |                        |      |                                            |             |                              |
|-------|------------------|------------------------|------|--------------------------------------------|-------------|------------------------------|
| [317] | Bipolar Disorder | Hao LI                 | 2020 | BMC Psychiatry                             | China       | GuangDong                    |
| [318] | Bipolar Disorder | Julia O Linke          | 2019 | Journal of Child Psychology and Psychiatry | USA         | Maryland                     |
| [319] | Bipolar Disorder | L.Squarcina            | 2019 | Bipolar Disord                             | Italy       | Verona                       |
| [320] | Bipolar Disorder | Koji Matsuo            | 2019 | Cerebral Cortex                            | Japan       | Yamaguchi/Hiroshima/Tokyo/TX |
| [321] | Bipolar Disorder | Sophia Frangou         | 2017 | Neuroimage                                 | UK          | multiple                     |
| [322] | Bipolar Disorder | Nhat Trung Doan        | 2017 | NeuroImage: Clinical                       | Norway      | Oslo                         |
| [323] | Bipolar Disorder | Vince D. Calhoun       | 2008 | Human Brain Mapping                        | USA         | Connecticut                  |
| [324] | Bipolar Disorder | Eric A Reavis          | 2017 | NeuroImage: Clinical                       | USA         | California                   |
| [325] | Bipolar Disorder | Benson Mwangi          | 2015 | Psychiatry Research                        | USA         | North Carolina               |
| [326] | Bipolar Disorder | Benson Mwangi          | 2017 | Bipolar Disord                             | USA         | Texas                        |
| [327] | Bipolar Disorder | Sergi G Costafreda     | 2011 | BMC Psychiatry                             | UK          | London                       |
| [328] | Bipolar Disorder | Barnaly Rashid         | 2016 | Neuroimage                                 | USA         | Connecticut                  |
| [329] | Bipolar Disorder | Tobias Kaufmann        | 2017 | Neuroimage                                 | Norway      | Oslo                         |
| [330] | Bipolar Disorder | Janaina Mourão-Miranda | 2012 | Bipolar Disord                             | UK          | London                       |
| [331] | Bipolar Disorder | Mon-Ju Wu              | 2017 | Neuroimage                                 | USA         | North Carolina               |
| [332] | Bipolar Disorder | Christian Bürger       | 2017 | Neuropsychopharmacology                    | Germany     | Münster                      |
| [333] | Bipolar Disorder | Hugo G Schnack         | 2013 | Neuroimage                                 | Netherlands | multiple                     |
| [334] | Bipolar Disorder | Alan Anticevic         | 2014 | Cerebral Cortex                            | USA         | Connecticut                  |
| [335] | Bipolar Disorder | A Besga                | 2012 | Neuroscience Letters                       | Spain       | Vitoria                      |
| [336] | Bipolar Disorder | Juan I. Arribas        | 2010 | IEEE Trans Biomed Eng                      | Spain       | Connecticut                  |
| [337] | Bipolar Disorder | Ye Chen                | 2014 | Journal of neuroscience methods            | USA         | unknown                      |
| [338] | Bipolar Disorder | Caixi Xi               | 2021 | Journal of affective disorders             | China       | Zhejiang                     |
| [339] | Bipolar Disorder | Shin Teng              | 2013 | Annu Int Conf IEEE Eng Med Biol Soc        | Taiwan      | Taipei                       |

|       |                           |                             |      |                                                                                                              |        |                        |
|-------|---------------------------|-----------------------------|------|--------------------------------------------------------------------------------------------------------------|--------|------------------------|
| [340] | Bipolar Disorder          | Yuhui Du                    | 2020 | NeuroImage: Clinical                                                                                         | USA    | multiple               |
| [341] | Bipolar Disorder          | Ravi Bansal                 | 2012 | Plos one                                                                                                     | USA    | New York               |
| [342] | Bipolar Disorder          | Adeleh Dehghani<br>Nazhvani | 2013 | Clin Neurol Neurosurg                                                                                        | Iran   | Shiraz                 |
| [343] | Bipolar Disorder          | Yen-Ling Chen               | 2020 | Front Neurosci                                                                                               | Taiwan | Taipei                 |
| [344] | Bipolar Disorder          | ZhuangzhuangLi              | 2021 | Computerized Medical Imaging and Graphics                                                                    | China  | JiangSu                |
| [345] | Bipolar Disorder          | WeizhengYan                 | 2021 | Schizophrenia research                                                                                       | USA    | multiple               |
| [346] | Bipolar Disorder          | Benson Mwangi               | 2017 | Biol Psychiatry Cogn Neurosci<br>Neuroimaging                                                                | USA    | Texas                  |
| [347] | Bipolar Disorder          | Su Mi Park                  | 2021 | Front Psychiatry                                                                                             | Korea  | Seoul                  |
| [348] | Major Depressive Disorder | Ayumu Yamashita             | 2020 | PLOS BIOL                                                                                                    | Japan  | Kyoto/Tokyo/Chiba      |
| [349] | Major Depressive Disorder | Luigi A Maglanoc            | 2019 | Human Brain Mapping                                                                                          | Norway | Oslo                   |
| [350] | Major Depressive Disorder | Miseon Shim                 | 2019 | NeuroImage: Clinical                                                                                         | USA    | Gimhae-si              |
| [351] | Major Depressive Disorder | Ji Ye Chun                  | 2020 | 2020 42nd Annual International<br>Conference of the IEEE Engineering in<br>Medicine & Biology Society (EMBC) | USA    | Sichuan/Henan/Zhejiang |
| [352] | Major Depressive Disorder | Caglar Uyulan               | 2021 | Clinical EEG and Neuroscience                                                                                | Turkey | Istanbul               |
| [353] | Major Depressive Disorder | Yachen Shi                  | 2021 | ACS Chemical Neuroscience                                                                                    | China  | multiple               |
| [354] | Major Depressive Disorder | Shalini Mahato              | 2020 | Journal of Medical Systems                                                                                   | India  | Jharkhand              |

|       |                           |                      |      |                                                    |        |                  |
|-------|---------------------------|----------------------|------|----------------------------------------------------|--------|------------------|
| [355] | Major Depressive Disorder | Hao Guo              | 2012 | Neuroreport                                        | China  | Shangxi          |
| [356] | Major Depressive Disorder | Hao Guo              | 2019 | Computational and mathematical methods in medicine | China  | Shangxi          |
| [357] | Major Depressive Disorder | Meenal J Patel       | 2015 | International journal of geriatric psychiatry      | USA    | Pennsylvania     |
| [358] | Major Depressive Disorder | Jie Yang             | 2018 | Human Brain Mapping                                | USA    | multiple         |
| [359] | Major Depressive Disorder | Mehran Ahmadlou      | 2012 | International Journal of Psychophysiology          | Iran   | Tehran           |
| [360] | Major Depressive Disorder | Matthew D Sacchet    | 2015 | Journal of Psychiatric Research                    | USA    | California       |
| [361] | Major Depressive Disorder | Rajamannar Ramasubbu | 2019 | Psychiatry and clinical neurosciences              | Canada | Calgary, Alberta |
| [362] | Major Depressive Disorder | Hanxiaoran Li        | 2021 | BMC Psychiatry                                     | China  | Zhejiang         |
| [363] | Major Depressive Disorder | Xue Zhong            | 2017 | Journal of affective disorders                     | China  | Hunan            |
| [364] | Major Depressive Disorder | Wenya Liu            | 2020 | Clinical Neurophysiology                           | China  | Niaoning         |
| [365] | Major Depressive Disorder | Shih-Cheng Liao      | 2017 | Sensors                                            | China  | Taibei           |
| [366] | Major Depressive Disorder | Maria J Rosa         | 2015 | Neuroimage                                         | UK     | London           |
| [367] | Major Depressive Disorder | David M Schnyer      | 2017 | Psychiatry Research: Neuroimaging                  | USA    | Texas            |



|       |                           |                      |      |                                                                                                          |        |                   |
|-------|---------------------------|----------------------|------|----------------------------------------------------------------------------------------------------------|--------|-------------------|
| [368] | Major Depressive Disorder | Blair A Johnston     | 2015 | Plos one                                                                                                 | UK     | Dundee            |
| [369] | Major Depressive Disorder | Feng Liu             | 2012 | Plos one                                                                                                 | China  | Hunan             |
| [370] | Major Depressive Disorder | Maobin Wei           | 2013 | Psychiatry Research: Neuroimaging                                                                        | China  | JiangSu           |
| [371] | Major Depressive Disorder | Shu-Hsien Chu        | 2018 | 2018 40th Annual International Conference of the IEEE Engineering in Medicine and Biology Society (EMBC) | USA    | Minnesota         |
| [372] | Major Depressive Disorder | Hao Guo              | 2017 | Computational and mathematical methods in medicine                                                       | China  | Shangxi           |
| [373] | Major Depressive Disorder | Ling-Li Zeng         | 2014 | Human Brain Mapping                                                                                      | China  | Hunan             |
| [374] | Major Depressive Disorder | Peng Fang            | 2012 | Plos one                                                                                                 | China  | Hunan             |
| [375] | Major Depressive Disorder | Wenjian Tan          | 2021 | Australian & New Zealand Journal of Psychiatry                                                           | China  | Hunan             |
| [376] | Major Depressive Disorder | Longlong Cao         | 2014 | Psychiatry and clinical neurosciences                                                                    | China  | Hunan             |
| [377] | Major Depressive Disorder | Ling-Li Zeng         | 2012 | Brain                                                                                                    | China  | Hunan             |
| [378] | Major Depressive Disorder | Rajamannar Ramasubbu | 2016 | NeuroImage: Clinical                                                                                     | Canada | Calgary, Alberta  |
| [379] | Major Depressive Disorder | Lihua Qiu            | 2014 | J Neural Transm (Vienna)                                                                                 | China  | Sichuan           |
| [380] | Major Depressive Disorder | Benson Mwang         | 2012 | Brain                                                                                                    | UK     | Aberdeen/Edinburg |

|       |                                       |                     |      |                                                                    |          |                                   |
|-------|---------------------------------------|---------------------|------|--------------------------------------------------------------------|----------|-----------------------------------|
| [381] | Disorder<br>Major Depressive Disorder | Jianlong Zhao       | 2020 | Journal of neuroscience methods                                    | China    | h<br>Beijing/Xian/ZhengZhou/Wuhan |
| [382] | Major Depressive Disorder             | Kun Bi              | 2016 | Journal of affective disorders                                     | China    | JiangSu                           |
| [383] | Major Depressive Disorder             | Xueling Zhu         | 2021 | Brain imaging and behavior                                         | China    | Hunan                             |
| [384] | Major Depressive Disorder             | A I Korda           | 2021 | Psychiatry Research: Neuroimaging                                  | Germany  | Philadelphia                      |
| [385] | Major Depressive Disorder             | Benedikt Sundermann | 2017 | J Neural Transm (Vienna)                                           | Germany  | multiple                          |
| [386] | Major Depressive Disorder             | Jiaolong Qin        | 2014 | Magnetic Resonance Imaging                                         | China    | JiangSu                           |
| [387] | Major Depressive Disorder             | Ying-Jie Li         | 2002 | Conf Proc IEEE Eng Med Biol Soc                                    | China    | Shanghai                          |
| [388] | Major Depressive Disorder             | Miseon Shim         | 2019 | NeuroImage: Clinical                                               | USA      | Goyang                            |
| [389] | Major Depressive Disorder             | Man Guo             | 2020 | J Neural Eng                                                       | China    | Ningxia                           |
| [390] | Major Depressive Disorder             | DANISH M. KHAN      | 2021 | ieee access                                                        | Malaysia | Iskandar                          |
| [391] | Major Depressive Disorder             | Bingtao Zhang       | 2021 | IEEE TRANSACTIONS ON NEURAL SYSTEMS AND REHABILITATION ENGINEERING | China    | Ningxia                           |
| [392] | Major Depressive Disorder             | Yibo Zhu            | 2020 | IEEE TRANSACTIONS ON NEURAL SYSTEMS AND REHABILITATION             | USA      | Texas                             |

## ENGINEERING

|       |                           |                   |      |                                   |        |            |
|-------|---------------------------|-------------------|------|-----------------------------------|--------|------------|
| [393] | Major Depressive Disorder | Xiangfei Geng     | 2018 | Front Neurosci                    | China  | Tianjing   |
| [394] | Major Depressive Disorder | Matthew D Sacchet | 2014 | Proc IEEE Int Symp Biomed Imaging | USA    | California |
| [395] | Major Depressive Disorder | Baoyu Yan         | 2020 | Front Neurosci                    | China  | Shanxi     |
| [396] | Major Depressive Disorder | Takashi Nakano    | 2020 | Front Psychiatry                  | Japan  | Hiroshima  |
| [397] | Major Depressive Disorder | Matthew D Sacchet | 2015 | Front Psychiatry                  | USA    | California |
| [398] | Major Depressive Disorder | Yachen Shi        | 2021 | Journal of affective disorders    | China  | JiangSu    |
| [399] | Major Depressive Disorder | Lijuan Duan       | 2020 | Frontiers in Human Neuroscience   | China  | Beijing    |
| [400] | Major Depressive Disorder | Abdolkarim Saeedi | 2021 | Cognitive Neurodynamics           | China  | Iskandar   |
| [401] | Major Depressive Disorder | Kun Bi            | 2018 | Journal of affective disorders    | China  | JiangSu    |
| [402] | Major Depressive Disorder | Jiaolong Qin      | 2015 | Journal of affective disorders    | China  | JiangSu    |
| [403] | Major Depressive Disorder | V Knott           | 2001 | Psychiatry Research               | Canada | Ontario    |
| [404] | Major Depressive Disorder | Andre F Marquand  | 2008 | Neuroreport                       | UK     | London     |
| [405] | Major Depressive Disorder | Qing Lu           | 2013 | Brain research                    | China  | JiangSu    |

|       |                                |                    |      |                                              |          |           |
|-------|--------------------------------|--------------------|------|----------------------------------------------|----------|-----------|
|       | Disorder                       |                    |      |                                              |          |           |
| [406] | Major Depressive Disorder      | R Cameron Craddock | 2009 | Magnetic Resonance Imaging                   | USA      | Georgia   |
| [407] | Major Depressive Disorder      | Min Kang           | 2020 | Sensors                                      | Korea    | Iskandar  |
| [408] | Major Depressive Disorder      | Giannis Lois       | 2016 | Social cognitive and affective neuroscience  | Germany  | Mannheim  |
| [409] | Major Depressive Disorder      | Fatemeh Hasanzadeh | 2020 | Journal of affective disorders               | Iran     | Tehran    |
| [410] | Major Depressive Disorder      | Wajid Mumtaz       | 2017 | Medical & Biological Engineering & Computing | Malaysia | Iskandar  |
| [411] | Social Anxiety Disorder        | Andreas Frick      | 2014 | Behav Brain Res                              | Sweden   | Uppsala   |
| [412] | Social Anxiety Disorder        | Wenjing Zhang      | 2015 | BioMed research international                | China    | Sichuan   |
| [413] | Social Anxiety Disorder        | Feng Liu           | 2015 | Brain Struct Funct                           | China    | Sichuan   |
| [414] | Social Anxiety Disorder        | Mengqi Xing        | 2020 | Front Psychiatry                             | USA      | Illinois  |
| [415] | Unspecified Anxiety Disorder   | Mihai Gavrilescu   | 2019 | Sensors                                      | Romania  | Bucharest |
| [416] | Unspecified Anxiety Disorder   | Yunlong Xie        | 2020 | Annu Int Conf IEEE Eng Med Biol Soc          | China    | Shanghai  |
| [417] | Unspecified Anxiety Disorder   | Su Mi Park         | 2021 | Front Psychiatry                             | Korea    | Seoul     |
| [418] | General Anxiety Disorder       | Jianping Qiao      | 2017 | Frontiers in Human Neuroscience              | China    | Shandong  |
| [419] | Obsessive-Compulsive Disorders | Xiaodan Xing       | 2020 | Brain and behavior                           | China    | Shenzhen  |
| [420] | Obsessive-Compulsive Disorders | Xi Yang            | 2019 | BMC Psychiatry                               | China    | Sichuan   |

|       |                                |                     |      |                                     |             |              |
|-------|--------------------------------|---------------------|------|-------------------------------------|-------------|--------------|
| [421] | Obsessive-Compulsive Disorders | Willem B. Bruin     | 2020 | Transl Psychiatry                   | Netherlands | multiple     |
| [422] | Obsessive-Compulsive Disorders | Yu Takagi           | 2017 | Scientific Report                   | Japan       | Kyoto        |
| [423] | Obsessive-Compulsive Disorders | Cong Zhou           | 2018 | Front Psychiatry                    | China       | Yunnan       |
| [424] | Obsessive-Compulsive Disorders | Xinyu Hu            | 2016 | Eur Neuropsychopharmacol            | China       | Sichuan      |
| [425] | Obsessive-Compulsive Disorders | Xuan Bu             | 2019 | Transl Psychiatry                   | China       | Sichuan      |
| [426] | Obsessive-Compulsive Disorders | Bhaskar Sen         | 2016 | Annu Int Conf IEEE Eng Med Biol Soc | USA         | Minnesota    |
| [427] | Obsessive-Compulsive Disorders | Lucas R Trambaiolli | 2017 | Journal of affective disorders      | Brazil      | Santo André  |
| [428] | Obsessive-Compulsive Disorders | Fei Li              | 2014 | Human Brain Mapping                 | China       | Sichuan      |
| [429] | Obsessive-Compulsive Disorders | Sona Khaneh Shenaz  | 2014 | Annu Int Conf IEEE Eng Med Biol Soc | Turkey      | Ankara       |
| [430] | Obsessive-Compulsive Disorders | Jing Liu            | 2021 | Human Brain Mapping                 | China       | Sichuan      |
| [431] | Obsessive-Compulsive Disorders | Wei Liu             | 2020 | Brain imaging and behavior          | China       | Tianjing     |
| [432] | Obsessive-Compulsive Disorders | Yunhui Chen         | 2021 | Neural Plast                        | China       | Heilongjiang |
| [433] | Obsessive-Compulsive Disorders | I Kalatzis          | 2005 | Conf Proc IEEE Eng Med Biol Soc     | Greece      | Athens       |

|       |                                |                     |      |                                              |         |           |
|-------|--------------------------------|---------------------|------|----------------------------------------------|---------|-----------|
| [434] | Obsessive-Compulsive Disorders | Serap Aydin         | 2015 | International Journal of Neural Systems      | Turkey  | Istanbul  |
| [435] | Posttraumatic Stress Disorder  | Sigal Zilcha-Mano   | 2020 | Biol Psychiatry Cogn Neurosci Neuroimaging   | Israel  | New York  |
| [436] | Posttraumatic Stress Disorder  | Andrew A Nicholson  | 2019 | Psychological Medicine                       | UK      | Ontario   |
| [437] | Posttraumatic Stress Disorder  | H Zhu               | 2020 | Acta Psychiatrica Scandinavia                | China   | Sichuan   |
| [438] | Posttraumatic Stress Disorder  | Miseon Shim         | 2019 | NeuroImage: Clinical                         | USA     | Goyang    |
| [439] | Posttraumatic Stress Disorder  | Andrew A Nicholson  | 2020 | NeuroImage: Clinical                         | Canada  | Ontario   |
| [440] | Posttraumatic Stress Disorder  | Sherain Harricharan | 2020 | Psychophysiology                             | Canada  | Ontario   |
| [441] | Posttraumatic Stress Disorder  | Su Mi Park          | 2021 | Front Psychiatry                             | Korea   | Seoul     |
| [442] | Somatic Symptom Disorder       | Aykut Eken          | 2019 | J Neural Eng                                 | Spain   | Barcelona |
| [443] | Anorexia Nervosa               | Lavagnino L         | 2015 | Psychological Medicine                       | USA     | Turin     |
| [444] | Anorexia Nervosa               | Luca Lavagnino      | 2018 | Int J Eat Disord.                            | USA     | Colorado  |
| [445] | Anorexia Nervosa               | Daniel Geisler      | 2018 | Psychological Medicine                       | Germany | Magdeburg |
| [446] | Bing-Eating Disorder           | Martin Weygandt     | 2012 | Human Brain Mapping                          | Germany | Berlin    |
| [447] | Insomnia Disorder              | Mi Hyun Lee         | 2021 | Scientific Report                            | Korea   | Inchon    |
| [448] | Insomnia Disorder              | Christoph Jansen    | 2019 | Chaos                                        | Germany | Berlin    |
| [449] | Conduct Disorder               | Jiang Zhang         | 2020 | Medical & Biological Engineering & Computing | China   | Hunan     |

|       |                                           |                      |      |                                            |          |                   |
|-------|-------------------------------------------|----------------------|------|--------------------------------------------|----------|-------------------|
| [450] | Conduct Disorder                          | Jianing Zhang        | 2019 | Brain imaging and behavior                 | China    | Hunan             |
| [451] | Conduct Disorder                          | Jianing Zhang        | 2018 | Frontiers in Human Neuroscience            | China    | Hunan             |
| [452] | Antisocial Personality Disorder           | Yan Tang             | 2013 | Plos one                                   | China    | Hunan             |
| [453] | Antisocial Personality Disorder           | Yan Tang             | 2013 | Neuroreport                                | China    | Hunan             |
| [454] | Antisocial Personality Disorder           | João R Sato          | 2012 | Social Neuroscience                        | Brazil   | Rio de Janeiro    |
| [455] | Other (or Unknown) Substance Use Disorder | Reagan R. Wetherill  | 2019 | Addict Biol                                | USA      | Pennsylvania      |
| [456] | Other (or Unknown) Substance Use Disorder | Yadi Li              | 2019 | Addict Biol                                | China    | Fujian            |
| [457] | Other (or Unknown) Substance Use Disorder | Xinfang Ding         | 2020 | Brain and behavior                         | China    | Shandong          |
| [458] | Other (or Unknown) Substance Use Disorder | Mutlu Mete           | 2016 | BMC Bioinformatics                         | USA      | Texas             |
| [459] | Alcohol Use Disorder                      | Ehsan Adeli          | 2020 | Biol Psychiatry Cogn Neurosci Neuroimaging | Canada   | California        |
| [460] | Alcohol Use Disorder                      | Matthias Guggenmos   | 2020 | Scientific Report                          | Germany  | Berlin            |
| [461] | Alcohol Use Disorder                      | Virender Kumar Mehla | 2020 | Journal of neuroscience methods            | India    | Illinois          |
| [462] | Alcohol Use Disorder                      | Xi Zhu               | 2019 | Neuroscience Letters                       | USA      | Maryland/New York |
| [463] | Alcohol Use Disorder                      | Wajid Mumtaz         | 2018 | Artificial Intelligence in Medicine        | Malaysia | Sabah             |
| [464] | Alcohol Use Disorder                      | Shui-Hua Wang        | 2017 | Journal of Medical Systems                 | China    | JiangSu           |
| [465] | Alcohol Use Disorder                      | Sivan Kinreich       | 2021 | Transl Psychiatry                          | USA      | multiple          |

|       |                                 |                       |      |                                                                                                   |             |                |
|-------|---------------------------------|-----------------------|------|---------------------------------------------------------------------------------------------------|-------------|----------------|
| [466] | Alcohol Use Disorder            | Youngoh Bae           | 2017 | Physiol Meas                                                                                      | Korea       | Illinois       |
| [467] | Alcohol Use Disorder            | Surendra Kumar        | 2015 | Medical & Biological Engineering & Computing                                                      | India       | Jharkhand      |
| [468] | Alcohol Use Disorder            | Danish M Khan         | 2021 | IEEE TRANSACTIONS ON NEURAL SYSTEMS AND REHABILITATION ENGINEERING                                | Malaysia    | Seri Iskandar  |
| [469] | Alcohol Use Disorder            | Wajid Mumtaz          | 2017 | Cognitive Neurodynamics                                                                           | Malaysia    | Sabah, Bingkor |
| [470] | Alcohol Use Disorder            | Sage Hahn             | 2020 | Human Brain Mapping                                                                               | USA         | multiple       |
| [471] | Alcohol Use Disorder            | Hongyi Zhang          | 2020 | Frontiers in Human Neuroscience                                                                   | China       | Illinois       |
| [472] | Alcohol Use Disorder            | Shui-Hua Wang         | 2019 | Front Psychiatry                                                                                  | China       | Henan          |
| [473] | Alcohol Use Disorder            | Sunil Kumar Prabhakar | 2020 | Heliyon                                                                                           | Korea       | Illinois       |
| [474] | Opioid Use Disorder             | Turker Tekin Erguzel  | 2019 | Clinical EEG and Neuroscience                                                                     | Turkey      | Istanbul       |
| [475] | Borderline Personality Disorder | Henk Cremers          | 2020 | European Archives of Psychiatry and Clinical Neuroscience                                         | Netherlands | Maastricht     |
| [476] | Borderline Personality Disorder | Tingting Xu           | 2014 | 2014 36th Annual International Conference of the IEEE Engineering in Medicine and Biology Society | USA         | Minnesota      |

**Table S1. Evidence table.** This table is to summary the metadata and metainformation of all the included studies (k = 476).
