# Supplementary material for: Sampling inequalities affect generalization of neuroimaging-based diagnostic classifiers in psychiatry
Source: Springer Nature journal article supplement (doi:10.1186/s12916-023-02941-4), 2023-07-03
Supplement: MOESM3 [file 25568348]

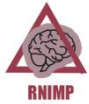

**RNIMP 2022 Checklist** for Reporting guideline for neuroimaging-based machine learning studies for psychiatry

| Section and topics        | Item # | Description                                                                                                                                                                             | Page for reporting location |
|---------------------------|--------|-----------------------------------------------------------------------------------------------------------------------------------------------------------------------------------------|-----------------------------|
| <b>PRE-REGISTRATION</b>   |        |                                                                                                                                                                                         |                             |
| Pre-register              | 0      | Reporting pre-registration platform and valid hyperlink to access it                                                                                                                    |                             |
| <b>TITLE AND ABSTRACT</b> |        |                                                                                                                                                                                         |                             |
| Title                     | 1      | Identifying study as machine-learning model aiming at psychiatric diagnoses                                                                                                             |                             |
| Abstract                  | 2      | Structurally reporting background, methods (internal and external sample size, model, cross-validation, at least), results (AUC, accuracy, sensitivity and specificity) and conclusions |                             |
| <b>INTRODUCTION</b>       |        |                                                                                                                                                                                         |                             |
| Introduction              | 3      | Describing rationale for clinical and scientific implications                                                                                                                           |                             |
|                           | 4      | Clarifying research proposal and hypotheses as reported in pre-registration                                                                                                             |                             |
| <b>METHODS</b>            |        |                                                                                                                                                                                         |                             |
| Research sample           | 5      | Identifying what sample population is for this study, such as different sites (multiple sites with different population would be recommended)                                           |                             |
| Sampling strategy         | 6      | Detailing how to determine the sample size                                                                                                                                              |                             |
| Data collection           | 7      | Reporting how to recruit participants or indicating what OA dataset is used                                                                                                             |                             |
| Data timing               | 8      | Reporting data collection date or duration                                                                                                                                              |                             |
| Inclusion criteria        | 9a     | Detailing how to include patients by clinical criteria, such as DSM-5 or ICD-10                                                                                                         |                             |
|                           | 9b     | Detailing how to include healthy control, and reporting the case/control ratio. If the ratio is at high risk of skewness, it would be reported for how to re-sample dataset             |                             |
| Exclusion criteria        | 10a    | Reporting how to exclude participants by clinical criteria, such as comorbidity and symptom                                                                                             |                             |
|                           | 10b    | Reporting how to remove participants as technical flaws, such as head-motion or artifact                                                                                                |                             |
| <b>DATA ANALYSIS</b>      |        |                                                                                                                                                                                         |                             |
| Technical details         | 11a    | Reporting adequate technical details for collecting data, such as scanner, task, equipment, scanning parameters, and neuroimaging modality, at least                                    |                             |



## RNIMP 2022 Checklist for Reporting guideline for neuroimaging-based machine learning studies for psychiatry

|                       |     |                                                                                                                                                                                                                                                            |
|-----------------------|-----|------------------------------------------------------------------------------------------------------------------------------------------------------------------------------------------------------------------------------------------------------------|
| Quality control       | 11b | Reporting how to perform quality control                                                                                                                                                                                                                   |
| Preprocessing         | 11c | Reporting how to preprocess raw neuroimaging data and detailing how to preprocess features preceding to build ML model, such as Fish's z transformation or 0-1 normalization (preprocessing feature vectors preceding to train model would be recommended) |
| <b>MODEL SETTINGS</b> |     |                                                                                                                                                                                                                                                            |
| Model                 | 12a | Reporting what model is built, such as SVM, GPC or RNN                                                                                                                                                                                                     |
| Toolkit               | 12b | Reporting what toolbox, software or self-made codes are used for building ML model                                                                                                                                                                         |
| Feature selection     | 12c | Reporting how to do feature selection and preparation (if applicable), and validating no leakage of testing data in selecting features                                                                                                                     |
| Parameters            | 12d | Reporting how to perform parameter selection (if applicable), such as kernel function or penalty function; clarifying what parameters are used in final ML model                                                                                           |
| Cross-validation      | 12e | Reporting what cross-validation scheme is adopted for estimating model performance (k-fold cross-validation portfolio would be recommended)                                                                                                                |
| External sample       | 12f | Reporting details of independently external sample(s) for validation and generalizability (if applicable)(External sample for validation would be recommended)                                                                                             |
| Control analysis      | 13  | Testing trained model by other sample splits or other populations (if applicable)                                                                                                                                                                          |
| Robustness analysis   | 14  | Testing model performance by different parameters for validating model robustness (if applicable)                                                                                                                                                          |
| Interpretation        | 15  | Reporting feature contributions or anything else facilitating to improve model interpretation (if applicable)                                                                                                                                              |
| <b>RESULTS</b>        |     |                                                                                                                                                                                                                                                            |
| Diagram               | 16  | Reporting the workflow diagram (see RNIMP 2022 Workflow Diagram)                                                                                                                                                                                           |
| Sample details        | 17  | Reporting final sample characteristics                                                                                                                                                                                                                     |
| Model performance     | 18  | Reporting mandatory measures for model performance, including accuracy, sensitivity, specificity, AUC, ROC plot and confusion matrix for inner and external samples (if applicable)                                                                        |
| Statistics            | 19  | Reporting how to make statistical inference, such as bootstrap or permutation test                                                                                                                                                                         |



**RNIMP 2022 Checklist** for Reporting guideline for neuroimaging-based machine learning studies for psychiatry

|                               |    |                                                                                                              |  |
|-------------------------------|----|--------------------------------------------------------------------------------------------------------------|--|
| Interpretation                | 20 | Interpreting how this model could perform well to predict patients                                           |  |
| <b>DISCUSSION</b>             |    |                                                                                                              |  |
| Model advance                 | 21 | Discussing how to achieve high model performance and major advance this model delivers                       |  |
| Interpretation                | 22 | Discussing how to explain this ML model by decoding feature contributions or patterns                        |  |
| Clarification                 | 23 | Discussing why methods or parameters are used inconsistently as reported in pre-registration (if applicable) |  |
| Implication                   | 24 | Discussing the clinical and scientific values for this model                                                 |  |
| Limitation                    | 25 | Discussing what limitations this model possesses and directing future research                               |  |
| <b>ADDITIONAL INFORMATION</b> |    |                                                                                                              |  |
| Model availability            | 26 | Reporting how to get access for trained model, such as OSF or Github (if applicable)                         |  |
| Code availability             | 27 | Reporting how to obtain codes or toolboxes to reproduce this study adequately (if applicable)                |  |
| Data availability             | 28 | Reporting how to gain raw data or materials (if applicable)                                                  |  |

**Tab. S1 RNIMP 2022 Checklist.** Reporting guideline and checklist for neuroimaging-based machine learning studies for psychiatry.

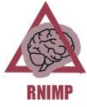

**RNIMP 2022 workflow diagram** for Reporting guideline for neuroimaging-based machine learning studies for psychiatry

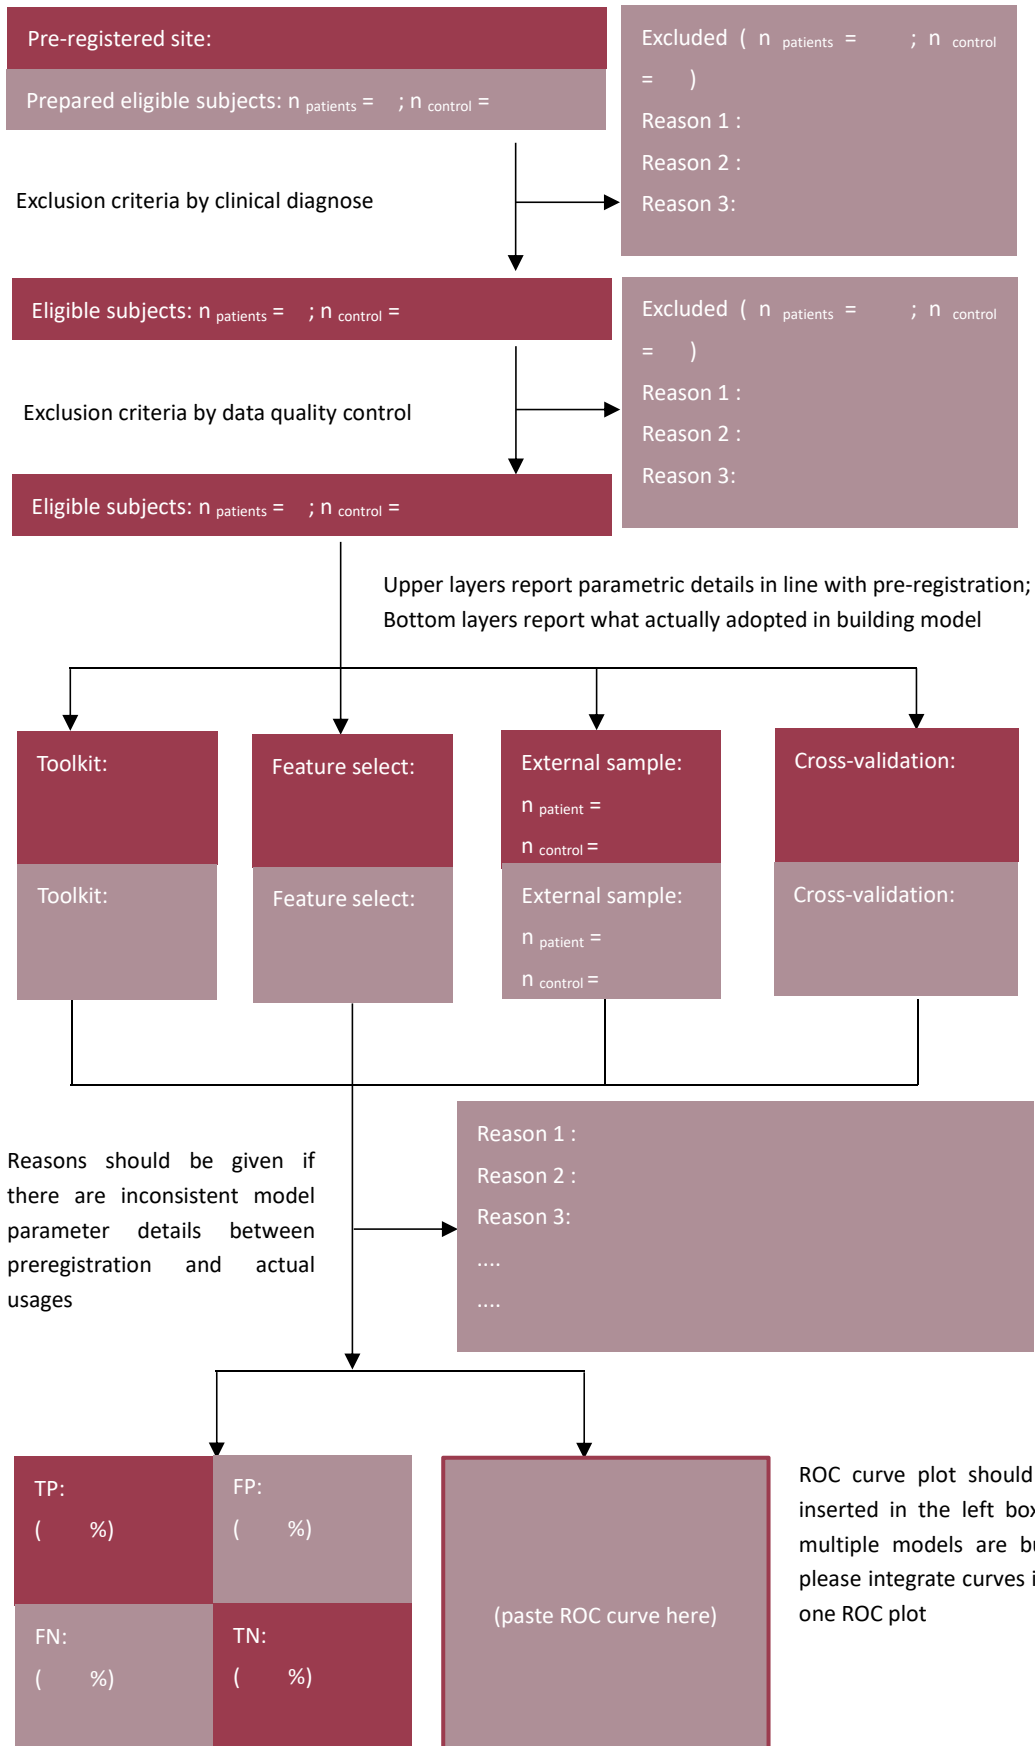



**RNIMP 2022 workflow diagram** for Reporting guideline for neuroimaging-based machine learning studies for psychiatry

**Tab. S2 RNIMP 2022 workflow diagram.** A workflow to guide for reporting neuroimaging-based machine learning models for psychiatry.
